1 **The transcription factor Rreb1 regulates epithelial architecture and**  
2 **invasiveness in gastrulating mouse embryos**

3

4 Sophie M. Morgani<sup>1,2,\*</sup>, Jie Su<sup>3</sup>, Jennifer Nichols<sup>1</sup>, Joan Massagué<sup>3</sup> and Anna-Katerina  
5 Hadjantonakis<sup>2,\*</sup>

6

7 <sup>1</sup> Developmental Biology Program, Sloan Kettering Institute, Memorial Sloan Kettering Cancer  
8 Center, New York, NY, 10065, USA.

9

10 <sup>2</sup> Wellcome Trust-Medical Research Council Centre for Stem Cell Research, University of  
11 Cambridge, Jeffrey Cheah Biomedical Centre Cambridge Biomedical Campus, Cambridge, CB2  
12 0AW, United Kingdom.

13 <sup>3</sup> Cancer Biology and Genetics Program, Sloan Kettering Institute, Memorial Sloan Kettering  
14 Cancer Center, New York, NY, 10065, USA.

15

16 \*Corresponding authors:

17 Sophie M. Morgani, PhD and Anna-Katerina Hadjantonakis, PhD

18 Email: [morganis@mskcc.org](mailto:morganis@mskcc.org), [hadj@mskcc.org](mailto:hadj@mskcc.org)

19

20

21 **ORCIDs**

22 SMM: <https://orcid.org/0000-0002-4290-1080>

23

24 JS: <https://orcid.org/0000-0002-3071-7139>

25

26 JN: <https://orcid.org/0000-0002-8650-1388>

27

28 JM: <https://orcid.org/0000-0001-9324-8408>

29

30 AKH: <https://orcid.org/0000-0002-7580-5124>

31

32

1 **Abstract**

2

3 Ras-responsive element-binding protein 1 (Rreb1) is a zinc-finger transcription factor  
4 downstream of RAS signaling. *Rreb1* has been implicated in cancer but little is known about its  
5 role in mammalian non-disease states. Here, we found that Rreb1 is essential for mouse  
6 embryonic development. Loss of *Rreb1* led to a reduction in the expression of vasculogenesis  
7 factors, cardiovascular defects and embryonic lethality. During gastrulation, the absence of  
8 *Rreb1* also resulted in the upregulation of cytoskeleton-associated genes, a change in the  
9 organization of F-ACTIN and adherens junctions within the pluripotent epiblast, and perturbed  
10 epithelial architecture characterized by irregular tissue folding and abnormal accumulations of  
11 cells. Moreover, *Rreb1* mutant cells ectopically exited the epiblast epithelium through the  
12 underlying basement membrane, paralleling cell behaviors observed during metastasis. Thus,  
13 disentangling the function of Rreb1 in development could shed light on its role in cancer and  
14 other diseases involving loss of epithelial integrity.

15

16

17

18

## 1 **1. Introduction**

2

3 Ras-responsive element-binding protein 1 (RREB1) is a zinc-finger transcription factor that acts  
4 downstream of RAS (Thiagalingam et al., 1996). It is evolutionarily conserved (Ming, Wilk,  
5 Reed, & Lipshitz, 2013), widely-expressed (FujimotoNishiyama, Ishii, Matsuda, Inoue, &  
6 Yamamoto, 1997), can function both as a transcriptional repressor and activator (Deng, Xia,  
7 Zhang, Ejaz, & Liang, 2020), and interacts with several signaling pathways, including  
8 EGFR/MAPK (M. Kim et al., 2020) and JNK/MAPK (Melani, Simpson, Brugge, & Montell, 2008;  
9 Reed, Wilk, & Lipshitz, 2001), which regulate RREB1 through phosphorylation, and JAK/STAT  
10 (Melani et al., 2008), TGF- $\beta$ /SMAD (Su et al., 2020), Notch, and Sonic Hedgehog (J. J. Sun &  
11 Deng, 2007), which cooperate with RREB1 in transcriptional regulation. These properties  
12 suggest that RREB1 plays key contextual biological roles.

13

14 Most of what we know about mammalian Rreb1 stems from cancer studies where mutations in,  
15 or altered expression of, this gene have been associated with leukemia (Yao et al., 2019),  
16 melanoma (Ferrara & De Vanna, 2016), thyroid (Thiagalingam et al., 1996), and prostate  
17 (Mukhopadhyay et al., 2007) cancers, as well as pancreatic and colorectal cancer metastasis  
18 (Cancer Genome Atlas Research Network. Electronic address & Cancer Genome Atlas  
19 Research, 2017; Hui et al., 2019; Kent, Sandi, Burston, Brown, & Rottapel, 2017; Li et al.,  
20 2018). However, the function of mammalian Rreb1 in normal, non-disease states remains  
21 unclear.

22

23 The *Drosophila* homolog of Rreb1, *Hindsight* (*hnt*, also known as *pebbled*), is required for  
24 embryonic development (Wieschaus, Nussleinvohard, & Jurgens, 1984) where it regulates cell-  
25 cell adhesion and collective migration in various contexts, including trachea and retinal  
26 formation, border cell migration, and germ-band retraction (Melani et al., 2008; Pickup, Lamka,  
27 Sun, Yip, & Lipshitz, 2002; Wilk, Reed, Tepass, & Lipshitz, 2000). Additionally, we recently  
28 reported that chimeric mouse embryos containing *Rreb1* mutant cells exhibit early embryonic  
29 phenotypes (Su et al., 2020), indicating that *Rreb1* has a role in mammalian development. The  
30 fundamental biological processes that regulate development are frequently hijacked in cancer. A  
31 notable example is the specification and patterning of the embryonic germ layers, known as  
32 gastrulation. Gastrulation involves an epithelial-mesenchymal transition (EMT), basement  
33 membrane remodeling, and collective cell migration, processes that also coordinately drive  
34 cancer progression (Aiello & Stanger, 2016; Cofre & Abdelhay, 2017). Thus, characterizing the

1 mechanisms and identifying critical factors that control development will shed light on how they  
2 are dysregulated in disease.

3  
4 Here we generated a *Rreb1* mutant mouse line and investigated its role and requirement during  
5 mouse embryonic development. We found that *Rreb1* is expressed within both the embryo-  
6 proper and the extraembryonic supporting tissues and is essential for a variety of processes  
7 including neural tube closure and vasculogenesis. Loss of *Rreb1* resulted in a change in the  
8 organization of the cytoskeleton and adherens junctions, increasingly variable cell orientation,  
9 irregular folding, and the emergence of aberrant cell masses within the pluripotent epiblast  
10 epithelium during gastrulation. Furthermore, a fraction of *Rreb1*<sup>-/-</sup> epiblast cells breached the  
11 underlying basement membrane, and ectopically exited the epithelium, seeding epiblast-like  
12 cells throughout the embryo. These data collectively demonstrated that *Rreb1* is required to  
13 maintain epithelial architecture during mammalian development and loss of this factor promotes  
14 cell behaviors reminiscent of those observed in metastasis. Thus, future studies to unravel the  
15 tissue-specific targets and mechanism of action of *Rreb1* during development may also shed  
16 light on its role in disease states.

17

## 18 **2. Results**

19

### 20 ***Rreb1* is expressed as cells exit pluripotency**

21

22 We first characterized the pattern of expression of *Rreb1* in the early mouse embryo using  
23 single-cell transcriptomic (scRNA-seq) datasets, previously generated by us and others  
24 (Nowotschin et al., 2019; Pijuan-Sala et al., 2019). These revealed that, at pre-implantation and  
25 early post-implantation stages (embryonic day (E) 3.5-5.5), *Rreb1* is expressed by  
26 trophoctoderm cells that form the fetal portion of the placenta, the inner cell mass (ICM) that  
27 gives rise to embryonic epiblast and extraembryonic primitive endoderm, and its descendants  
28 contributing to the yolk sac (Figure S1A) (Nowotschin et al., 2019). At the onset of gastrulation  
29 (E6.5), *Rreb1* is expressed within trophoctoderm-derived extraembryonic ectoderm (ExE),  
30 primitive endoderm-derived visceral endoderm (VE), and the epiblast-derived primitive streak,  
31 where cells undergo an EMT and start to differentiate into the mesoderm and endoderm germ  
32 layers (Figure S1A) (Pijuan-Sala et al., 2019). From E7.75 onwards, *Rreb1* is broadly expressed  
33 including in the epiblast, primitive streak, neurectoderm, mesoderm, and definitive endoderm  
34 (DE) (Figure S1A) (Pijuan-Sala et al., 2019).

1  
2 We validated these scRNA-seq data in wholemount preparations of embryos expressing a  
3 LacZ-tagged transcriptional reporter (S1B Fig, European Conditional Mouse Mutagenesis  
4 Program) (Bradley et al., 2012), and confirmed *Rreb1*<sup>LacZ</sup> expression within the ICM and  
5 trophectoderm of the blastocyst (Figure S1C), as well as within the VE before gastrulation (E5.5,  
6 Figure 1A), the VE, primitive streak, embryonic and extraembryonic mesoderm (cells derived  
7 from the primitive streak), and distal anterior epiblast during gastrulation (E6.5-7.5, Figure 1A,  
8 S1D), and within the yolk sac endoderm, node, notochord, primitive streak, blood, allantois,  
9 head mesenchyme, and pharyngeal arches at E8.0-10.5, around midgestation (Figure 1A, S1D-  
10 H). A comparable expression pattern was detected by mRNA *in situ* hybridization (Figure S1I).  
11 At E10.5, *Rreb1*<sup>LacZ</sup> was expressed in regions of high FGF signaling activity (Morgani, Saiz, et  
12 al., 2018), including the limb buds, frontonasal processes and isthmus (Figure S1G).  
13 Furthermore, the expression domain of *Rreb1*<sup>LacZ</sup> within the tail bud varied between individual  
14 embryos (Figure S1G), suggesting that it is transcriptionally regulated by the segmentation  
15 clock. *In vitro*, *Rreb1*<sup>LacZ</sup> marked a subpopulation of pluripotent embryonic stem cells and  
16 epiblast stem cells, when maintained under self-renewing conditions, and became more widely  
17 expressed as cells were driven to differentiate by the removal of the cytokine LIF or addition of  
18 FGF (Figure 1B). Thus, *Rreb1* is expressed in the embryonic lineages as pluripotency is exited  
19 and the germ layers are specified, and in the extraembryonic tissues.

20

## 21 ***Rreb1* is essential for mouse embryonic development**

22

23 We previously used *Rreb1*<sup>-/-</sup> cells to generate chimeric mouse embryos and found that these  
24 exhibited severe morphological defects during gastrulation (Su et al., 2020). To interrogate the  
25 developmental function of *Rreb1*, we proceeded to generate a *Rreb1* knockout mouse using  
26 CRISPR-Cas9 technology (Figure 2A, Materials and methods). *Rreb1*<sup>+/-</sup> mice were viable and  
27 fertile, but heterozygous intercrosses yielded no homozygous mutant offspring. From E7.5  
28 onwards, mutant embryos were smaller than wild-type littermates (Figure 2B, C, S2A, B) and,  
29 based on morphology and somite number, were approximately 9.5 hours retarded (Figure S2B,  
30 C). At E9.0-9.5, *Rreb1*<sup>-/-</sup> embryos exhibited various defects, including microcephaly (2/7 at E9.5,  
31 Figure S2D), an open foregut (Figure S2E), and an open neural tube at the forebrain, midbrain,  
32 and posterior neuropore level (8/10 *Rreb1*<sup>-/-</sup> at E9.5, Figure 2D-E, S2F). *Rreb1*<sup>-/-</sup> embryos with  
33 open neural tubes were recovered, albeit at lower frequencies, at E10.5 (2/8 *Rreb1*<sup>-/-</sup>, Figure 2B,  
34 3F), indicating that this phenotype is partially associated with the developmental delay.

1  
2 Additionally, mutant embryos displayed aberrant notochord formation. In wild-type embryos, the  
3 axial mesoderm, marked by BRACHYURY expression in cells anterior to the gut tube, gives rise  
4 to the prechordal plate rostrally (Figure S2G i) and to the tube-like notochord caudally (Figure  
5 S2G ii-iv) (Balmer, Nowotschin, & Hadjantonakis, 2016). However, in *Rreb1*<sup>-/-</sup>, BRACHYURY-  
6 expressing cells did not establish a tube, instead, intercalating into the foregut (Figure S2G v),  
7 protruding into the foregut lumen (Figure S2G vi), or generating multiple distinct clusters (Figure  
8 S2G vii). Thus, loss of *Rreb1* results in a range of phenotypic abnormalities initiating at  
9 gastrulation and resulting in midgestation lethality.

10  
11 Homozygous mutants began to be resorbed at E11.5, indicated by the disintegration of  
12 embryonic tissues (Figure 2C), and were not recovered at E12.5 (Figure 2F). Thus, *Rreb1* is  
13 essential for mouse development, where it regulates a variety of processes.

#### 14 15 ***Rreb1* is required for cardiovascular development**

16  
17 *Rreb1* is a transcription factor that functions as a context-dependent repressor or activator  
18 (Deng et al., 2020). To define the transcriptional changes associated with a developmental loss  
19 of *Rreb1* and gain insights into its mechanism of action, we performed RNA-sequencing of  
20 *Rreb1*<sup>-/-</sup> embryos and compared them to wild-type (*Rreb1*<sup>+/+</sup>) transcriptomes. Embryos were  
21 isolated and analyzed at E7.5 (Figure 3A), coinciding with the emergence of overt morphological  
22 defects resulting from loss of *Rreb1* (Figure S2A, B). We identified 65 genes that were  
23 significantly downregulated and 200 that were upregulated in *Rreb1*<sup>-/-</sup> vs. *Rreb1*<sup>+/+</sup> embryos  
24 (fold-change >log<sub>2</sub>(2), *p* <0.05, Table S1).

25  
26 To assess the function of these genes, we implemented Gene Ontology (GO) and Kyoto  
27 Encyclopedia of Genes and Genomes (KEGG) pathway analysis. Downregulated genes were  
28 enriched for multiple GO terms associated with blood, including 'blood microparticle', 'fibrinogen  
29 complex', and 'platelet alpha granule' (Table S2), and the 'complement and coagulation  
30 cascades' (Table S3) that play a role in vasculogenesis (Girardi, Yarinin, Thurman, Holers, &  
31 Salmon, 2006; Moser & Patterson, 2003). Key genes within these groups included the  
32 complement inhibitor proteins *Cd59a*, and complement component factor I (*Cfi*), and the  
33 secreted proteins fibrinogen alpha and gamma (*Fga*, *Fgg*), complement factor B (*Cfb*), protein C  
34 (*Proc*) and *Alpha fetoprotein (Afp)*. We also observed a downregulation of *Jag2* and *Slit1* (Table

1 S1), components of the Notch and Slit-Robo signaling pathways respectively that regulate  
2 hematopoiesis and vasculogenesis (Blockus & Chedotal, 2016; Kofler et al., 2011).

3  
4 The majority of these factors (84% of 55 transcripts detected by scRNA-seq of gastrulating  
5 mouse embryos (Nowotschin et al., 2019; Pijuan-Sala et al., 2019)) were specifically expressed  
6 by or highly enriched within the VE (Figure 3B, S3A). As our data was generated by whole  
7 embryo bulk RNA-sequencing, the downregulation, almost solely, of VE-associated genes could  
8 represent a relative decrease in the size of the VE compared to other tissues. However, other  
9 critical VE-associated genes, for example, the transcription factors and VE lineage determinants  
10 *Gata6*, *Gata4*, *Sox17*, and *Hnf4a* (Figure S3B), were not altered in *Rreb1*<sup>-/-</sup> mutants. Thus, the  
11 observed transcriptional changes did not represent a global shift in the VE program.

12  
13 *Afp* (downregulated in *Rreb1*<sup>-/-</sup>) is a plasma glycoprotein secreted by the yolk sac and fetal liver  
14 that regulates angiogenesis (O. D. Liang et al., 2004; Takahashi, Ohta, & Mai, 2004). To  
15 validate our RNA-sequencing, we crossed *Rreb1*<sup>+/-</sup> mice to a transgenic reporter whereby the  
16 *Afp* cis-regulatory elements drive GFP expression (Kwon et al., 2006), and analyzed *Rreb1*<sup>+/+</sup>  
17 and *Rreb1*<sup>-/-</sup>; *Afp*-GFP<sup>Tg/+</sup> embryos (Figure S3C). In wild-type E7.5 and 8.5 embryos, *Afp*-GFP is  
18 expressed by embryonic VE cells (Kwon et al., 2006; Kwon, Viotti, & Hadjantonakis, 2008), and  
19 throughout the extraembryonic VE, with highest levels at the embryonic-extraembryonic  
20 boundary (Figure 3C, S3D). Like their wild-type littermates, *Rreb1*<sup>-/-</sup> mutant embryos expressed  
21 *Afp*-GFP within the embryonic VE and at the embryonic-extraembryonic boundary but,  
22 consistent with our transcriptional data, showed little to no *Afp*-GFP within the extraembryonic  
23 VE (Figure 3C, S3D).

24  
25 Based on these transcriptional changes, we then asked whether vascular development was  
26 perturbed in the absence of *Rreb1*. We observed that, at E9.5-10.5, wild-type embryos  
27 established a hierarchical branched network of blood vessels within the yolk sac and embryo-  
28 proper (Figure 3Di-iii) but, in contrast, *Rreb1*<sup>-/-</sup> embryos had dysmorphic yolk sac capillaries that  
29 resembled a primitive capillary plexus (5/6 *Rreb1*<sup>-/-</sup> at E9.5, 4/6 *Rreb1*<sup>-/-</sup> at E10.5, Figure 3D iv,  
30 S3E, F i) and leakage of blood into the extravascular space (Figure 3D v, S3E). Various  
31 cardiovascular defects were also observed within the *Rreb1*<sup>-/-</sup> embryo-proper including little to  
32 no blood within the fetus (2/6 *Rreb1*<sup>-/-</sup> at E9.5, 1/6 *Rreb1*<sup>-/-</sup> at E10.5, Figure 3D vi, S3F iii),  
33 pooling of blood (2/6 *Rreb1*<sup>-/-</sup> at E9.5, 4/6 *Rreb1*<sup>-/-</sup> at E10.5), a reduced vascular network (3/6  
34 *Rreb1*<sup>-/-</sup> at E10.5, Figure S3F ii) with fewer and wider blood vessels, particularly apparent in the

1 cranial region (Figure 3E, S3G, H), widespread hemorrhaging (1/6 *Rreb1*<sup>-/-</sup> at E9.5, Figure 3D  
2 vii), an enlarged heart (2/6 *Rreb1*<sup>-/-</sup> at E9.5, Figure 3D vi), and pericardial edema (2/8 *Rreb1*<sup>-/-</sup> at  
3 E10.5, Figure 3F). Therefore, loss of *Rreb1* results in the downregulation of vasculogenesis-  
4 associated genes and compromised cardiovascular development, culminating in embryonic  
5 lethality at midgestation.

### 7 ***Rreb1* regulates cytoskeleton and adherens junction organization within the epiblast**

8  
9 We then performed GO analysis of genes that were significantly upregulated in E7.5 *Rreb1*<sup>-/-</sup> vs.  
10 *Rreb1*<sup>+/+</sup> embryos, finding that these were enriched for 4 main categories; ‘cytoskeleton’,  
11 ‘membrane and vesicle trafficking’, ‘cell junctions’, and ‘extracellular space’ (Table S2). Factors  
12 associated with the cytoskeleton included microtubule components (*Tubb3*), microtubule-  
13 interacting proteins (*Map6*, *Jakmip2*, *Fsd1*), microtubule motors (*Kif5a*, *Kif5c*, *Kif12*), actin-  
14 binding proteins (*Coro1a*), and factors that connect adherens junctions to the cytoskeleton  
15 (*Ctnna2*, *Ablim3*) (Figure 4A). Genes within the ‘vesicle trafficking’ category were also related to  
16 the cytoskeleton. For example, Rab family members (*Rab6b*, *Rab39b*) (Figure 4A) regulate  
17 vesicle transport along actin and microtubule networks.

18  
19 We therefore asked whether these cytoskeleton-centered transcriptional changes corresponded  
20 to a change in cytoskeleton organization in *Rreb1*<sup>-/-</sup> mutants. In the normal (wild-type, *Rreb1*<sup>+/+</sup>)  
21 epiblast epithelium F-ACTIN was arranged into linear filaments oriented parallel to cell junctions  
22 (Figure 4B, C). In contrast, we found that F-ACTIN was punctate at proximal epiblast cell  
23 junctions within *Rreb1*<sup>-/-</sup> embryos (Figure 4B, C).

24  
25 The cytoskeleton interacts with and influences the localization of adherens junction components  
26 (X. Y. Chen, Kojima, Borisy, & Green, 2003; X. Liang, Gomez, & Yap, 2015; Mary et al., 2002;  
27 Mege & Ishiyama, 2017; Sako-Kubota, Tanaka, Nagae, Meng, & Takeichi, 2014; Stehbens et  
28 al., 2006; Teng et al., 2005). As we noted a significant upregulation of *Ctnna2* and *Ablim3*,  
29 which encode proteins connecting the cytoskeleton to adherens junctions (Figure 4A), we asked  
30 whether the change in F-ACTIN was also associated with a rearrangement of cell junctions.  
31 Cadherins are critical components of adherens junctions and, during gastrulation, E-CADHERIN  
32 is expressed within the epiblast, VE, and extraembryonic ectoderm (Pijuan-Sala et al., 2019). In  
33 wild-type embryos, E-CADHERIN, similar to F-ACTIN, forms a continuous belt between  
34 epithelial epiblast cells but, in *Rreb1* mutants, showed a punctate localization (Figure 4D, E,



1 S4A-C).  $\beta$ -CATENIN was also more punctate at *Rreb1* mutant compared to wild-type epiblast  
2 junctions (Figure S4D), indicating that adherens junction complexes were altered. The change  
3 in E-CADHERIN and  $\beta$ -CATENIN protein localization was not associated with a transcriptional  
4 change in these genes, or in the expression of other adhesion-associated factors, such as tight  
5 junction components (Figure S4E), indicating that this altered localization occurs by post-  
6 transcriptional mechanisms. Therefore, loss of *Rreb1* results in a change in the expression of  
7 cytoskeleton-associated factors and a change in the organization of the cytoskeleton and  
8 adherens junctions within the epiblast.

9

### 10 ***Rreb1* maintains epithelial architecture of embryonic and extraembryonic tissues**

11

12 The cytoskeleton is the scaffold of the cell that regulates cell-cell adhesion (Elson, 1988; Gavara  
13 & Chadwick, 2016; Grady, Composto, & Eckmann, 2016; Ketene, Roberts, Shea, Schmelz, &  
14 Agah, 2012) and epithelial organization (Bachir, Horwitz, Nelson, & Bianchini, 2017; Ivanov,  
15 Parkos, & Nusrat, 2010; B. Sun, Fang, Li, Chen, & Xiang, 2015; Vasileva & Citi, 2018). In  
16 cancer, a cytoskeleton-mediated switch from linear to punctate E-CADHERIN can occur,  
17 resulting in weaker cell-cell adhesion and loss of epithelial integrity (Aiello et al., 2018; Ayollo,  
18 Zhitnyak, Vasiliev, & Gloushankova, 2009; Gloushankova, Rubtsova, & Zhitnyak, 2017; Jolly et  
19 al., 2015; Kovac, Makela, & Vallenius, 2018; Saitoh, 2018). In keeping with this, *Rreb1*<sup>-/-</sup>  
20 embryos exhibited perturbed epithelial architecture during gastrulation. In wild-type embryos, VE  
21 cells form an ordered monolayer epithelium overlying the embryonic epiblast and the ExE  
22 (Figure 5A, B, S5A), while in *Rreb1*<sup>-/-</sup> embryos, cells protruded from the VE at various angles  
23 (Figure 5A), and the extraembryonic VE was frequently ruffled (Figure 5B, S5A). Moreover,  
24 abnormal masses of E-CADHERIN<sup>+</sup> VE cells accumulated at the anterior embryonic-  
25 extraembryonic boundary (Figure 5C, S5B).

26

27 *Rreb1*<sup>-/-</sup> initiated gastrulation in the posterior of the embryo, as marked by downregulation of the  
28 pluripotency-associated transcription factor SOX2 and upregulation of the primitive streak  
29 marker BRACHYURY (Figure 5D). Furthermore, *Rreb1*<sup>-/-</sup> epiblast cells underwent an EMT at the  
30 primitive streak, delaminated from the epithelium, and migrated anteriorly in the wings of  
31 mesoderm (Figure 5E). While there was an increase in the fluorescence intensity of N-  
32 CADHERIN immunostaining within the VE of *Rreb1*<sup>-/-</sup> vs. *Rreb1*<sup>+/+</sup> embryos (Figure 5E), this was  
33 also observed with other antibodies and is likely associated with changes in the architecture of  
34 the VE leading to an increase in non-specific background staining within this tissue. Cells within

1 *Rreb1*<sup>-/-</sup> embryos also differentiated into mesoderm and DE, marked by GATA6 and SOX17  
2 expression respectively (Figure 5D, S5C). Hence, *Rreb1*<sup>-/-</sup> mutant cells can specify and begin to  
3 pattern the embryonic germ layers.

4  
5 However, the mutant epiblast showed a range of morphological defects similar to those within  
6 the VE, including uncharacteristic folding of the epithelial layer (Figure 5E, F i, S5D), abnormal  
7 accumulations of cells (Figure 5F ii), increasingly variable cell orientation (Figure S5E-G),  
8 separation of typically closely apposed tissue layers, such as the mesoderm and endoderm  
9 (Figure 5D, E, S5H), and cells falling out of the epiblast (Figure S5I). In wild-type embryos,  
10 epiblast cells divide at the apical, cavity-facing surface while being maintained within the  
11 epithelial layer but, in *Rreb1*<sup>-/-</sup> embryos, we observed dividing cells that left the epithelium  
12 (Figure S5J). Additionally, the epiblast and endoderm are monolayer epithelia in wild-type  
13 embryos but formed multilayered regions in *Rreb1*<sup>-/-</sup> mutants (Figure 5F iii).

14  
15 Epithelial homeostasis requires tight regulation of proliferation and the maintenance of cell  
16 polarity. *Rreb1*<sup>-/-</sup> embryos showed no difference in the absolute or relative number of dividing  
17 cells within the epiblast, VE, or mesoderm when compared to wild-type littermates (Figure S5K,  
18 L). Furthermore, apicobasal polarity of the *Rreb1*<sup>-/-</sup> epiblast cells was unaffected, demonstrated  
19 by the correct positioning of the tight junction protein ZO-1 at the apical surface and the  
20 basement membrane protein LAMININ at the basal surface (Figure S5M, N). Together these  
21 data show that loss of *Rreb1* results in disrupted epithelial architecture of both embryonic and  
22 extraembryonic tissues, associated with altered cytoskeleton and adherens junction  
23 organization.

## 24 25 ***Rreb1* mutant embryos display invasive phenotypes**

26  
27 In the context of cancer, cells that display punctate E-CADHERIN localization are considered to  
28 represent an intermediate epithelial-mesenchymal state (Sha et al., 2019; Yang et al., 2020),  
29 characterized by an increased propensity for collective invasion and metastasis (Aiello et al.,  
30 2018; Ayollo et al., 2009; Gloushankova et al., 2017; Jolly et al., 2015; Kovac et al., 2018;  
31 Saitoh, 2018). This state is linked to the downregulation of the transcription factor *Ovol1* (Jia et  
32 al., 2015; Saxena, Srikrishnan, Celia-Terrassa, & Jolly, 2020), which suppresses a  
33 mesenchymal identity, and the tight junction component, *Claudin7* (Aiello et al., 2018; W. K. Kim  
34 et al., 2019; Wang, Xu, Li, & Ding, 2018). Notably, both of these factors were also significantly

1 downregulated in *Rreb1*<sup>-/-</sup> embryos (Figure S6A). Furthermore, we observed that some *Rreb1*<sup>-/-</sup>  
2 epiblast cells acquired mesenchymal characteristics. In wild-type embryos, the mesenchymal  
3 marker and EMT regulator SNAIL was expressed within the primitive streak and the wings of  
4 mesoderm (Figure 6A). However, in *Rreb1*<sup>-/-</sup> embryos SNAIL was ectopically expressed within  
5 epiblast cells that were precociously exiting the epithelium (Figure 6A). Moreover, these cells  
6 exhibited punctate β-CATENIN, in contrast to the linear localization observed in neighboring  
7 SNAIL negative epiblast cells (Figure S6B). In *Rreb1*<sup>-/-</sup> embryos, we also occasionally observed  
8 chains of cells that traversed tissue layers, including cells expressing the epiblast marker SOX2  
9 that crossed the VE (Figure 6B, S6C) and cells expressing the mesoderm and endoderm  
10 marker GATA6 that spanned the epiblast (Figure S6C). In the majority of cases, these aberrant  
11 cells crossed the VE (Figure S6C, D) and SOX2-positive (SOX2<sup>+</sup>) pyknotic nuclei were  
12 detected on the adjacent exterior surface of the embryo (Figure S6C).

13  
14 In order to examine the cell-autonomous versus non-cell-autonomous effects of *Rreb1*, we then  
15 generated chimeric embryos by introducing *Rreb1*<sup>-/-</sup> ESCs into wild-type host embryos so that  
16 the embryonic epiblast-derived tissues are a mosaic of wild-type and mutant origin and  
17 extraembryonic tissues are wild-type (Figure 6C). In E7.5 chimeric embryos, we frequently  
18 observed ectopic SOX2<sup>+</sup> cells were dispersed throughout the embryo (30/63, 48% of *Rreb1*<sup>-/-</sup>  
19 chimeric embryos, Figure 6D, E, S6E, 33-190 ectopic SOX2<sup>+</sup> cells/per embryo). These cells  
20 expressed higher levels of SOX2 than most cells within the epiblast epithelium (Figure S6F) and  
21 were predominantly sandwiched between the epiblast and outer endoderm (Figure S6G).  
22 SOX2-high cells were also found less frequently within the epiblast, cavity, and wings of  
23 mesoderm (Figure S6G). These SOX2<sup>+</sup> cells divided and persisted until later stages of  
24 development (Figure S6H). Ectopic cells emerged prior to, or at the onset of, gastrulation  
25 (Figure S6I), and hence this was not a secondary consequence of gastrulation defects (Su et  
26 al., 2020). Thus, loss of *Rreb1* causes cells to ectopically exit the pluripotent epiblast epithelium  
27 in gastrulating mouse embryos.

### 28 29 **Invasive cells in *Rreb1*<sup>-/-</sup> chimeras are associated with a distinct ECM organization**

30  
31 In chimeric embryos, ectopic SOX2<sup>+</sup> cells were of both wild-type and mutant origin (Figure 7A,  
32 S7A), indicating that invasive-like behaviors were not driven solely by cell-autonomous  
33 properties, such as changes in the cytoskeleton and adherens junctions. Remodeling of the  
34 extracellular matrix (ECM) could promote invasive behaviors of both wild-type and mutant cells.

1 We noted that many of the genes that were significantly altered in *Rreb1*<sup>-/-</sup> embryos were  
2 associated with ECM and cell-ECM adhesion. For example, *Tff3* (Ahmed, Griffiths, Tilby,  
3 Westley, & May, 2012; Pandey et al., 2014), *Hpsc* (Liu et al., 2019), *Slit1* (Gara et al., 2015),  
4 *Spon1* (Chang et al., 2015), *Spock1* and *Spock3* (Q. Chen et al., 2016) are associated with  
5 increased cancer cell invasion and were upregulated in *Rreb1*<sup>-/-</sup>, and *Selenbp1* (Caswell et al.,  
6 2018; Schott et al., 2018) and *Serp16b* (Chou et al., 2012) are tumor suppressor genes that  
7 were downregulated. including *Spock3*, *Spon1*, *Muc13*, and *Spp2* (Figure 7B, Table S2).  
8 Therefore, we asked whether the basement membrane underlying the epiblast was perturbed in  
9 *Rreb1*<sup>-/-</sup> chimeras.

10

11 In wild-type chimeras, the basement membrane at the epiblast-VE interface is broken down in  
12 the posterior of the embryo at the primitive streak during gastrulation, as cells undergo an EMT  
13 (Figure 7C). In *Rreb1*<sup>-/-</sup> embryo chimeras, the basement membrane was broken down at the  
14 primitive streak but also in anterior and lateral regions of the epiblast (Figure 7C, S7B). SOX2+  
15 cells were observed traversing these ectopic basement membrane breaks (Figure 7C).  
16 Furthermore, aberrant SOX2+ cells were surrounded by higher levels of Laminin than their  
17 neighbors and associated with Laminin tracks, up to 68 μm (approximately 7 cell diameters) in  
18 length (Figure 7D, S7C). Thus, loss of *Rreb1* in the mouse embryo caused epiblast epithelial  
19 cells to cross the basement membrane underlying the epiblast epithelium, reminiscent of the  
20 invasive cell behaviors observed in cancer metastasis. These defects were associated with cell-  
21 autonomous changes in the cytoskeleton as well as non-cell-autonomous changes in the ECM.  
22 KEGG pathway analysis also revealed that the genes upregulated in *Rreb1*<sup>-/-</sup> embryos were  
23 enriched for pathways associated with cancer, including 'Pathways in cancer', 'MicroRNAs in  
24 cancer', and 'Gastric cancer' (3/5 most enriched pathways, Figure 7E). Together these data  
25 suggest that the embryonic role of *Rreb1* may be functionally linked to its role in cancer (Figure  
26 7F).

27

### 28 **3. Discussion**

29

30 The transcription factor *Rreb1* is necessary for invertebrate development (Melani et al., 2008;  
31 Pickup et al., 2002; Wieschaus et al., 1984; Wilk et al., 2000) and is implicated in cancer  
32 (Ferrara & De Vanna, 2016; Hui et al., 2019; Kent et al., 2017; Li et al., 2018; Mukhopadhyay et  
33 al., 2007; Thiagalingam et al., 1996; Yao et al., 2019), suggesting that it plays critical contextual  
34 organismal functions. Despite this, we know little about its role in mammalian development.

1 Here we demonstrate that *Rreb1* is essential for mouse embryo development. Loss of *Rreb1*  
2 resulted in disrupted epithelial architecture of both embryonic and extraembryonic tissues.  
3 These defects were consistent with the reported role of the *Drosophila* homolog of *Rreb1*,  
4 Hindsight (*hnt*), which regulates cell adhesion during invertebrate development (Melani et al.,  
5 2008; Pickup et al., 2002; Wilk et al., 2000). Pluripotent epiblast cells fell out of their epithelial  
6 layer into the space between the epiblast and VE in both *Rreb1*<sup>-/-</sup> mutant embryos and  
7 chimeras. Similarly, loss of *hnt* in the *Drosophila* retina causes cells to fall out of the epithelium  
8 into the underlying tissue layer (Pickup et al., 2002). Thus, *Rreb1* is an evolutionarily conserved  
9 regulator of tissue architecture.

10  
11 *Rreb1* homozygous mutant embryos die at midgestation due to a range of cardiovascular  
12 defects, including perturbed yolk sac vasculogenesis. Although *Rreb1* was not highly expressed  
13 by the yolk sac mesoderm, which will give rise to endothelial cells, it was robustly expressed by  
14 the overlying yolk sac endoderm (Figure S1G). The yolk sac endoderm is known to secrete  
15 factors that regulate cardiogenesis, vasculogenesis and hematopoiesis (Arai, Yamamoto, &  
16 Toyama, 1997; Belaoussoff, Farrington, & Baron, 1998; Byrd et al., 2002; Damert, Miquerol,  
17 Gertsenstein, Risau, & Nagy, 2002; Dyer, Farrington, Mohn, Munday, & Baron, 2001; Goldie,  
18 Nix, & Hirschi, 2008; Miura & Wilt, 1969; Wilt, 1965). Moreover, *Rreb1* mutants showed a  
19 significant downregulation of a cohort genes encoding secreted vasculogenesis-associated  
20 factors, as well as genes involved in vesicular transport that form part of the secretory pathway.  
21 Thus, the role of *Rreb1* in embryonic vasculogenesis is likely mediated via paracrine  
22 interactions with the VE.

23  
24 We previously showed that, in a cancer model, *Rreb1* directly binds to the regulatory region of  
25 *Snai1* in cooperation with TGF- $\beta$  activated SMAD transcription factors to induce the expression  
26 of SNAIL, which drives EMT (Su et al., 2020). Furthermore, mouse embryos containing *Rreb1*<sup>-/-</sup>  
27 cells exhibit an accumulation of cells at the primitive streak, consistent with a disrupted  
28 gastrulation EMT (Su et al., 2020). These data suggested that *Rreb1* may be required for EMT  
29 in both development and disease contexts. However, upon closer examination we found that  
30 loss of *Rreb1* also disrupts epithelial architecture. We found that, in the mouse embryo, *Rreb1* is  
31 expressed not only in mesenchymal tissues, such as the primitive streak and mesoderm, but  
32 also within epithelial tissues such as the trophectoderm, VE and the notochord. Thus, *Rreb1*  
33 does not drive EMT in all contexts. Likewise, in *Drosophila*, *hnt* exhibits context-dependent  
34 adhesion regulation. For example, loss of *hnt* in the trachea and retina disrupts epithelial

1 architecture (Pickup et al., 2002; Wilk et al., 2000), while loss of hnt from border cells results in  
2 increased cell-cell adhesion (Melani et al., 2008). Thus, its function likely depends on the  
3 combination of factors and signaling activities present within any given cell where it is  
4 expressed.

5  
6 Global transcriptional analysis of *Rreb1*<sup>-/-</sup> embryos revealed that loss of *Rreb1* significantly alters  
7 the transcription of cytoskeleton-associated genes, including actin-binding proteins, microtubule  
8 components and microtubule motor proteins. Hnt also genetically interacts with and  
9 transcriptionally regulates cytoskeleton-associated genes, such as *chickadee* (*Profilin1*), which  
10 governs actin polymerization and depolymerization, the F-ACTIN crosslinker *karst* (*Alpha-*  
11 *actinin-1*), Actin-binding protein *jitterbug* (*Filamin A*), a microtubule motor *dynamitin* (*Dynactin2*)  
12 and *Rho1*, a GTPase that regulates cytoskeleton organization (Oliva et al., 2015; Wilk, Pickup,  
13 Hamilton, Reed, & Lipshitz, 2004). While the specific factors downstream of *Rreb1* and hnt are  
14 distinct, these data suggest a conserved role in cytoskeleton regulation. The transcriptional  
15 changes in cytoskeleton regulators corresponded to a change in the organization of the  
16 cytoskeleton and adherens junctions whereby wildtype epiblast cell junctions displayed a  
17 continuous, linear arrangement of F-ACTIN, E-CADHERIN and  $\beta$ -CATENIN, while *Rreb1*<sup>-/-</sup>  
18 exhibited a punctate localization. ACTIN interacts with cadherins (M. K. L. Han & de Rooij,  
19 2017) and thus may directly influence their localization. The cytoskeleton mediates vesicular  
20 trafficking, which can also regulate E-CADHERIN localization (Aiello et al., 2018; X. Y. Chen et  
21 al., 2003; Chung et al., 2014; X. Liang et al., 2015; Mary et al., 2002; Pilot, Philippe, Lemmers,  
22 & Lecuit, 2006; Sako-Kubota et al., 2014; Stehbens et al., 2006; Teng et al., 2005; Vasileva &  
23 Citi, 2018), and a large number of trafficking genes were upregulated in *Rreb1*<sup>-/-</sup> embryos.  
24 Therefore, a combination of altered vesicle trafficking and/or direct changes in the cytoskeleton  
25 may regulate E-CADHERIN localization. As *Rreb1* is not expressed highly throughout the  
26 epiblast, these phenotypes are either due to a loss of low-level epiblast expression or mediated  
27 through paracrine interactions with the VE. Future tissue-specific ablations of *Rreb1*, and  
28 chromatin immunoprecipitation (ChIP) studies to identify direct targets, will distinguish between  
29 these possibilities.

30

31 A reduction in ACTIN stress fibers enhances the motility and deformability of cells and is  
32 associated with an invasive phenotype in cancer (Grady et al., 2016; Y. L. Han et al., 2020;  
33 Katsantonis et al., 1994; Suresh, 2007; Xu et al., 2012). Moreover, altered ACTIN organization  
34 (Gloushankova et al., 2017; Kovac et al., 2018) and punctate E-CADHERIN is indicative of an

1 intermediate epithelial-mesenchymal state, which also correlates with weaker cell-cell adhesion  
2 and collective invasion in metastasis (Aiello et al., 2018; George, Jolly, Xu, Somarelli, & Levine,  
3 2017; Jolly et al., 2015; Saitoh, 2018). In keeping with this, *Rreb1*<sup>-/-</sup> cells displayed invasive  
4 phenotypes *in vivo* resulting in ectopic SOX2<sup>+</sup> epiblast-like cells positioned throughout chimeric  
5 embryos. However, ectopic cells were of wild-type and mutant origin indicating that not only cell-  
6 autonomous properties, such as cytoskeletal organization, but also cell non-autonomous  
7 mechanisms drive this behavior. *Rreb1/hnt* phenotypically interacts with and transcriptionally  
8 regulates ECM-associated factors such as *viking* (*Col4a1*), *Cg25c* (*Col4a2*), *Mmp2* and  
9 *Adamts5* (Deady, Li, & Sun, 2017; Wang et al., 2017; Wilk et al., 2004). We also observed a  
10 change in the expression of ECM-associated factors in *Rreb1*<sup>-/-</sup> embryos, some of which have  
11 been linked to changes in the metastatic potential of cells. Furthermore, KEGG pathway  
12 analysis of downregulated genes revealed that these were associated with the complement and  
13 coagulation cascades, which control a variety of processes, including ECM remodeling, and the  
14 corruption of this pathway is linked to cancer metastasis (Ajona, Ortiz-Espinosa, Pio, &  
15 Lecanda, 2019). Thus, changes in ECM composition in *Rreb1*<sup>-/-</sup> embryos may drive invasive  
16 behaviors. Ectopic SOX2<sup>+</sup> cells were associated with abnormal breaks in the basement  
17 membrane, elevated levels of Laminin, and Laminin tracks. These ECM tracks are reminiscent  
18 of bundles of parallel Collagen fibers, referred to as “microtracks”, observed in cancer.  
19 Microtracks are generated through ECM remodeling by invasive leader cells, which  
20 subsequently facilitates the migration of less invasive cells within the tumor (Gaggioli, 2008;  
21 Gaggioli et al., 2007; Poltavets, Kochetkova, Pitson, & Samuel, 2018). Intriguingly, ectopic  
22 SOX2<sup>+</sup> cells of wild-type origin were adjacent to *Rreb1*<sup>-/-</sup> cells. Thus, *Rreb1*<sup>-/-</sup> cells might perform  
23 a role comparable to leader cells in cancer metastasis, remodeling the ECM to permit migration  
24 of wild-type neighbors.

25  
26 In sum, we have identified cell behaviors and phenotypes in *Rreb1* mutant mouse embryos,  
27 which are reminiscent of those observed during cancer cell invasion, including loss of epithelial  
28 architecture, aberrant basement membrane breakdown, ECM remodeling, and ectopic exit of  
29 cells from an epithelium. The early mouse embryo is an experimentally tractable *in vivo* system  
30 to interrogate these phenotypes and thus, future studies of the function of *Rreb1* in development  
31 may also shed light on its role in metastasis and other diseases involving loss of epithelial  
32 integrity.

33

#### 34 **4. Materials and methods**

1

## 2 **Generation and maintenance of mouse lines**

3

4 Mice were housed under a 12 hr light-dark cycle in a specific pathogen-free room in the  
5 designated facilities of MSKCC. Natural matings were set up in the evening and mice were  
6 checked for copulation plugs the following morning. The date of vaginal plug was considered as  
7 E0.5. Genotyping was carried out at the time of weaning. Mice were outbred to CD1 animals and  
8 maintained on a mixed bred CD-1/129 Sv/C57BL6/C2J background in accordance with the  
9 guidelines of the Memorial Sloan Kettering Cancer Center (MSKCC) Institutional Animal Care and  
10 Use Committee (IACUC).

11

12 To generate the *Rreb1*<sup>LacZ</sup> reporter mouse line, *in vitro* fertilization was performed using  
13 C57BL/6N-A<sup>tm1Brd</sup> *Rreb1*<sup>tm1a(EUCOMM)Wtsi/WtsiPh</sup> (RRID:IMSR\_EM:10996) sperm obtained from the  
14 European Conditional Mouse Mutagenesis Program (EUCOMM). The Tm1a (knockout-first)  
15 allele was genotyped by PCR using the following primers: *Rreb1* 5' arm:  
16 CTTCTGTCCCAGAAGCTACATTGC, *Rreb1* 3' arm: GGACAACGGTCACTGAGAAGATGG,  
17 Lar3: CAACGGGTTCTTCTGTTAGTCC and the protocol: Step1 - 95 °C for 3 min, Step 2–35x:  
18 95 °C for 30 s, 63 °C for 30 s, 72 °C for 30 s, Step 3–72 °C for 3 min. This results in a wild-type  
19 allele amplicon band of 751 bp and a transgenic allele amplicon of 502 bp. Tm1a mice were  
20 then crossed with a Flp recombinase mouse line (Rodriguez et al., 2000) to remove the  
21 neomycin cassette and Exon 6, producing the Tm1b LacZ tagged null allele. *Rreb1*<sup>LacZ/+</sup>  
22 embryos were analyzed by X-gal staining to determine the *Rreb1* expression pattern.

23

24 *Rreb1*<sup>-/-</sup> mutant mice were generated by CRISPR-mediated genetic knockout. The CRISPR  
25 gRNAs used for deleting exon 6 of the *Rreb1* gene were designed using the approach of  
26 Romanienko et. al (Romanienko et al., 2016). The sequences of the guides are: crRNA#1:  
27 TATTATGAACTCCTCTGGAC, crRNA#2: AGTGTCTTCGAAAGAGCCAA, crRNA#3:  
28 CGTTACAACAAAGCACCTT, crRNA#4: AGGAAAACCTCGTAGTGGCAC. To initiate cleavage  
29 and subsequent deletion of the target locus in mice, guides were injected in pairs, either #1 and  
30 #3 or #2 and #4, into the pronuclei of mouse zygotes at a concentration of 50 ng/μl each, with 100  
31 ng/μl purified Cas9 protein (PNABio, Newbury Park, CA), using conventional techniques  
32 (Behringer, Gertsenstein, Vintersten Nagy, & Nagy, 2014). Founder mice were analyzed for the  
33 deletion by PCR using the primers RREB2: GACACCTAGTCACCGAGGAAAC and RREB6:  
34 CTGTGGCAGATCTGGTAGGC. This primer pair is located outside of the gRNA cleavage sites,



1 thereby revealing the size of the deletion based on the nucleotide length of the amplicon obtained.  
2 The wild type amplicon size is 1019bp. The deletion amplicons, if there had been a simple cut  
3 and rejoining, would be: Cr#1 and #3: 275bp. Cr#2 and #4: 456bp. Genotyping of the *Rreb1* locus  
4 was performed by PCR with primers RREB1\_1: GTGACAGAGGGAACAGTGGG, RREB1\_2:  
5 GACACCTAGTCACCGAGGAAAC, RREB1\_3: GTGTCTGTGTTGTGCTGCA using the following  
6 protocol: Step1 - 94 °C for 3 min, Step 2–35x: 95 °C for 30 s, 64 °C for 90 s, 72 °C for 1 min, Step  
7 3–72 °C for 5 min, resulting in a 358 bp amplicon for the wild-type allele and a 275 bp amplicon  
8 for the mutant allele. *Rreb1*<sup>-/-</sup> mice were embryonic lethal at midgestation but no peri-natal lethality  
9 was observed for *Rreb1*<sup>-/+</sup> mice. Therefore, the *Rreb1* mouse line was maintained and *Rreb1*<sup>-/-</sup>  
10 embryos were obtained through heterozygous *Rreb1*<sup>-/+</sup> intercrosses.

11

## 12 **Generation of chimeric embryos**

13

14 Approximately 10-15 *Rreb1*<sup>-/-</sup> ESCs, described in (Su et al., 2020), harboring a constitutive  
15 mCherry fluorescent lineage tracer were injected into E3.5 blastocysts (C57BL/6J, Jackson  
16 Laboratory, Bar Harbor, ME) as previously described (Su et al., 2020). Injected blastocysts were  
17 cultured in KSOM/AA (Millipore, Billerica, MA) at 37°C in an atmosphere of 5% CO<sub>2</sub> to allow for  
18 recovery of blastocyst morphology and then implanted into the uterine horns (up to ten embryos  
19 per horn) of E2.5 pseudopregnant females (C57BL/6J;CBA F1, Jackson Laboratory) using  
20 standard protocols. Chimeric embryos were recovered between E7.5-E9.5.

21

## 22 **Wholemout in situ hybridization**

23 To produce the *Rreb1* riboprobes, RNA was isolated from pooled E12.5 CD1 mouse embryos  
24 using an RNeasy® Plus Mini Kit (Qiagen, Hilden, Germany) and then used to generate cDNA  
25 with a QuantiTect Reverse Transcription Kit (Qiagen), as per manufacturer's instructions.

26 Primers (5' UTR L: GGGCCTTTGTCTCATGCTCC, 5' UTR R:

27 CGCAGAATGTTTTCTCAACAG) were designed against a unique 502 bp region within the

28 *Rreb1* 5' UTR and used to PCR amplify this fragment from E12.5 embryo cDNA. The PCR

29 product was purified using a QIAquick® PCR Purification Kit (Qiagen) and a TOPO™ TA

30 Cloning™ Kit (K461020, Thermo Fisher Scientific) used to introduce the fragment into a

31 pCR™ II-TOPO™ Vector and transformed into E.coli. Colonies were picked,

32 expanded and the plasmid isolated for sequencing. A plasmid containing the

33 correct sequence (5'-

34 CGCAGAATGTTTTCTCAACAGTTGACAATTTTAGGATAAATAGAACTTTAGAAAAATTACTA

1 CTATCAATCATCTAAGTATTCCGAATAGGAAAAAAGTCAAATAAGTAAGGGACGCTGGA  
2 GCTACCTCAGTGAAGGGGAAAAAATATCCAATCCCACCTTTTCTGTATTACATGTGTGGTAGC  
3 TAAAGAACTCCATAGAATGTTCAAAAAAAAAAAAAAAAAAGACGGCACTGAAGATTATCATGTC  
4 AAAGCACCAAGCTCATTACATCACTGTTACCTTAATGCAAAGTCCCACCTTCTCCGGAATGG  
5 CCTCCATACTTAGAACTCTTGGAAGTTGTCAGGCAAAGGTTATGGGGAGGGGAAGTGAAG  
6 GAGCCTATGACCACTGTCAGTGTCTGATACATTTATTTACAGATAAGCCTTGGTGGCTCA  
7 GACCACAGGCACAGATTATATGGAAAGTAACAGCCTGTGACTTCTGAGACAAAGAATGGAG  
8 CATGAGACAA-3') was selected, linearized and the dual promoter system within the pCR™ II-  
9 TOPO™ Vector used to amplify and DIG label both a control sense and an  
10 antisense probe. Whlemount mRNA *in situ* hybridization was then carried out as previously  
11 reported (Conlon & Rossant, 1992).

12

### 13 **X-gal staining**

14

15 X-gal staining of cells and embryos containing the *Rreb1*-LacZ reporter was performed using a  
16 β-Gal Staining Kit (K146501, Invitrogen, Waltham, MA) as per manufacturer's instructions.  
17 Embryos and cells were fixed for 15 mins at room temperature followed by staining until the blue  
18 color was detectable (2-3 hours) at 37 °C.

19

### 20 **Cell culture**

21

22 Cells were maintained in standard serum/LIF ESC medium (Dulbecco's modified Eagle's  
23 medium (DMEM) (Gibco, Gaithersburg, MD) containing 0.1 mM non-essential amino-acids  
24 (NEAA), 2 mM glutamine and 1 mM sodium pyruvate, 100 U/ml Penicillin, 100 µg/ml  
25 Streptomycin (all from Life Technologies, Carlsbad, CA), 0.1 mM 2-mercaptoethanol (Sigma, St.  
26 Louis, MO), and 10% Fetal Calf Serum (FCS, F2442, Sigma) and 1000 U/ml LIF) as previously  
27 described (Morgani, Metzger, Nichols, Siggia, & Hadjantonakis, 2018). C57BL/6N-  
28 A<sup>tm1Brd</sup> *Rreb1*<sup>tm1a(EUCOMM)Wtsi/WtsiPh</sup> (RRID:IMSR\_EM:10996) embryonic stem cell lines were  
29 used to analyze *Rreb1* expression and also converted to an epiblast stem cell (EpiSC) state  
30 through prolonged culture (more than 5 passages) in N2B27 medium containing 12 ng/ml FGF2  
31 (233-FB-025, R&D Systems) and 20 ng/ml ACTIVIN A (120-14P, Peprotech, Rocky Hills, NJ),  
32 as previously described (Tesar et al., 2007).

33

### 34 **Immunostaining**

1  
2 Cell lines were immunostained as previously described (Morgani, Metzger, et al., 2018). Post-  
3 implantation embryos were fixed in 4 % paraformaldehyde (PFA) for 15 min at room  
4 temperature (RT). Embryos were washed in phosphate-buffered saline (PBS) plus 0.1 % Triton-  
5 X (PBST-T) followed by 30 min permeabilization in PBS with 0.5 % Triton-X. Embryos were  
6 washed in PBS-T and then blocked overnight at 4 °C in PBS-T, 1 % bovine serum albumin  
7 (BSA, Sigma) and 5 % donkey serum. The following day, embryos were transferred to the  
8 primary antibody solution (PBS-T with appropriate concentration of antibody) and incubated  
9 overnight at 4 °C. The next day, embryos were washed 3 x 10 min in PBS-T and then  
10 transferred to blocking solution at RT for a minimum of 5 hr. Embryos were transferred to  
11 secondary antibody solution (PBS-T with 1:500 dilution of appropriate secondary conjugated  
12 antibody) and incubated overnight at 4 °C. Embryos were then washed 3 x 10 min in PBS-T with  
13 the final wash containing 5 µg/ml Hoechst. Where F-ACTIN staining was performed, Alexa  
14 Fluor™ conjugated phalloidin (Thermo Fisher Scientific, Waltham, MA) was added to the  
15 primary and secondary antibody solutions at a 1:500 dilution.

## 16 17 **Antibodies**

18  
19 The following primary antibodies were used in this study: β-catenin (RRID:AB\_397555, BD  
20 Transduction labs, Billerica, MA, 610154, 1:500), Brachyury (RRID:AB\_2200235, R&D, AF2085,  
21 1:100), CD31 (RRID:AB\_394819, BD Biosciences, 553373, 1:100) CD105 (RRID:AB\_354735,  
22 R&D Systems, AF1320, 1:100), E-cadherin (RRID:AB\_477600, Millipore Sigma, U3254, 1:200),  
23 Gata6 (RRID:AB\_10705521, D61E4 XP, Cell Signaling, 5851, 1:500), GFP (RRID:AB\_300798,  
24 Abcam, ab13970), Laminin (RRID:AB\_477163, Millipore Sigma, L9393, 1:500), N-cadherin  
25 (RRID:AB\_2077527, BD Biosciences, 610920, 1:200), RFP (Rockland, Limerick, PA, 600-400-  
26 379, 1:300), Snail (RRID:AB\_2191738, R&D Systems, AF3639, 1:50), Sox2  
27 (RRID:AB\_11219471, Thermo Fisher Scientific, 14-9811-82, 1:200), Sox17 (RRID:AB\_355060,  
28 R&D Systems, AF1924, 1:100), ZO-1 (RRID:AB\_87181, Invitrogen, 33-9100, 1:200).

## 29 30 **Cryosectioning**

31  
32 Embryos were oriented as desired and embedded in Tissue-Tek® OCT (Sakura Finetek,  
33 Japan). Samples were frozen on dry ice for approximately 30 min and subsequently maintained  
34 for short periods at -80 °C followed by cryosectioning using a Leica CM3050S cryostat.

1 Cryosections of 10  $\mu\text{m}$  thickness were cut using a Leica CM3050S cryostat and mounted on  
2 Colorfrost Plus® microscope slides (Fisher Scientific) using Fluoromount G  
3 (RRID:SCR\_015961, Southern Biotech, Birmingham, AL) and imaged using a confocal  
4 microscope as described.

5

## 6 **Confocal imaging and quantitative image analysis**

7

8 Embryos were imaged on a Zeiss LSM880 laser scanning confocal microscope. Whole-mount  
9 embryos were imaged in glass-bottom dishes (MatTek, Ashland, MA) in PBS. Raw data were  
10 processed in ImageJ open-source image processing software (Version: 2.0.0-rc-49/1.51d).

11

12 Nuclei orientation (Figure S5E-G) was measured manually using Fiji (RRID:SCR\_002285,  
13 Image J) software. Using the angle tool, we measured the angle between the long axis of  
14 individual epiblast nuclei and the underlying basement membrane, marked by Laminin staining  
15 on confocal optical sections of transverse cryosections. We measured the angle of 143 cells  
16 from 3 *Rreb1*<sup>+/+</sup> embryos and 136 cells from 3 *Rreb1*<sup>-/-</sup> embryos.

17

18 We quantified proliferation in *Rreb1*<sup>+/+</sup> versus *Rreb1*<sup>-/-</sup> embryos (Figure S5L) by manually  
19 counting the number of phosphorylated histone H3 (pHH3) positive cells in the epiblast, outer  
20 endoderm layer or wings of mesoderm in transverse cryosections of *Rreb1*<sup>+/+</sup> or *Rreb1*<sup>-/-</sup>  
21 embryos. Initially, cell counts were also categorized as divisions in anterior versus posterior  
22 embryonic regions but, as no differences were observed, these data were subsequently  
23 combined. We performed counts on cryosections comprising 3 entire embryos per genotype.  
24 Data was analyzed as the absolute numbers of dividing cells per cell type. Additionally, we  
25 counted the total number of cells per cell type per section and normalized the number of dividing  
26 cells to this value to account for differences based on embryo or tissue size. Statistics were  
27 performed on a per embryo rather than a per cell basis.

28

29 The level of GFP in the VE of *Afp*-GFP ; *Rreb1*<sup>+/+</sup> and *Rreb1*<sup>-/-</sup> embryos was quantified by  
30 manually selecting the embryonic and extraembryonic region of confocal maximum intensity  
31 projection images and measuring the mean fluorescence intensity using Fiji software.

32

33 Quantification of SOX2 protein levels (Figure S6F) were carried out on cryosections of *Rreb1*<sup>-/-</sup>  
34 chimeric embryos containing cells expressing high levels of SOX2 (SOX2<sup>HI</sup> cells) to determine

1 the approximate fold change in protein level relative to normal surrounding cells. To make  
2 measurements, nuclei were manually identified using the freehand selection tool in Fiji software.  
3 Aberrant SOX2<sup>Hi</sup> cells could readily be distinguished from standard neighboring cells by their  
4 elevated signal after immunostaining for SOX2 protein. Mean fluorescence intensity of SOX2  
5 immunostaining was measured within all SOX2<sup>Hi</sup> nuclei within a particular cryosection and an  
6 equivalent number of randomly selected nuclei with normal SOX2 expression within the anterior  
7 and posterior epiblast regions were measured. Mean SOX2 fluorescence intensity in each  
8 nucleus was normalized to the corresponding mean fluorescence intensity of the Hoechst nuclear  
9 stain. All data is shown relative to the mean SOX2 fluorescence intensity measured in 'normal'  
10 anterior epiblast cells of the same confocal optical section. A total of 8 embryos, 35 cryosections  
11 and 696 cells were analyzed. Statistics were carried out on the average fluorescence levels per  
12 embryo.

13  
14 The localization of SOX2<sup>Hi</sup> cells (identified manually from SOX2 immunostaining) (Figure S6G)  
15 was scored based on their location within confocal images of cryosectioned *Rreb1*<sup>-/-</sup> chimeric  
16 embryos. Scoring was carried out on 76 cryosections from 7 independent embryos that  
17 contained high numbers of SOX2<sup>Hi</sup> cells. SOX2<sup>Hi</sup> cells were scored as being within the Epi itself,  
18 at the Epi-VE interface (outside of the epiblast epithelium), within the primitive streak or wings of  
19 mesoderm (mesoderm) or within the amniotic cavity.

20

## 21 **Statistics**

22

23 Statistical analysis of significance was assessed using a One-way ANOVA ( $p < 0.0001$ ) followed  
24 by unpaired *t*-tests to compare particular groups (GraphPad Prism, RRID:SCR\_002798,  
25 GraphPad Software, Inc., Version 7.0a).

26

## 27 **RNA-sequencing and data analysis**

28

29 Frozen tissue was homogenized in TRIzol Reagent (ThermoFisher catalog # 15596018) using  
30 the QIAGEN TissueLyser at 15 Hz for 2-3 min with a Stainless-Steel Bead (QIAGEN catalog #  
31 69989). Phase separation was induced with chloroform. RNA was precipitated with isopropanol  
32 and linear acrylamide and washed with 75% ethanol. The samples were resuspended in  
33 RNase-free water. After RiboGreen quantification and quality control by Agilent BioAnalyzer,  
34 150 g of total RNA underwent polyA selection and TruSeq library preparation according to

1 instructions provided by Illumina (TruSeq Stranded mRNA LT Kit, catalog # RS-122-2102), with  
2 8 cycles of PCR. Samples were barcoded and run on a HiSeq 4000 in a 50 bp/50 bp paired-end  
3 run, using the HiSeq 3000/4000 SBS Kit (Illumina). An average of 47 million paired reads was  
4 generated per sample. The percent of mRNA bases averaged 67%.

5  
6 The output data (FASTQ files) were mapped to the target genome using the rnaStar aligner  
7 (Dobin et al., 2013) that maps reads genomically and resolves reads across splice junctions.  
8 We used the 2 pass mapping method outlined in (Engstrom et al., 2013), in which the reads are  
9 mapped twice. The first mapping pass uses a list of known annotated junctions from Ensemble.  
10 Novel junctions found in the first pass were then added to the known junctions and a second  
11 mapping pass is done (on the second pass the RemoveNoncanonical flag is used). After  
12 mapping we post-processed the output SAM files using the PICARD tools to: add read groups,  
13 AddOrReplaceReadGroups which in additional sorts the file and converts it to the compressed  
14 BAM format. We then computed the expression count matrix from the mapped reads using  
15 HTSeq ([www-huber.embl.de/users/anders/HTSeq](http://www-huber.embl.de/users/anders/HTSeq)) and one of several possible gene model  
16 databases. The raw count matrix generated by HTSeq was then processed using the  
17 R/Bioconductor package DESeq ([www-huber.embl.de/users/anders/DESeq](http://www-huber.embl.de/users/anders/DESeq)) which is used to  
18 both normalize the full dataset and analyze differential expression between sample groups. The  
19 data was clustered in several ways using the normalized counts of all genes that a total of 10  
20 counts when summed across all samples; 1. Hierarchical cluster with the correlation metric ( $D_{ij}$   
21  $= 1 - \text{cor}(X_i, X_j)$ ) with the Pearson correlation on the normalized log<sub>2</sub> expression values. 2.  
22 Multidimensional scaling. 3. Principal component analysis. Heatmaps were generated using the  
23 heatmap.2 function from the gplots R package. For the Heatmaps the top 100 differentially  
24 expressed genes are used. The data plot represents the mean-centered normalized log<sub>2</sub>  
25 expression of the top 100 significant genes. We ran a gene set analysis using the GSA package  
26 with gene sets from the Broads mSigDb. The sets used were: Mouse: c1, c2, c3, c4, c5. Gene  
27 ontology analyses were performed using the Database for Annotation, Visualization, and  
28 Integrated Discovery (DAVID) Bioinformatics resource (Version 6.8) gene ontology functional  
29 annotation tool (<http://david.abcc.ncifcrf.gov/tools.jsp>) with all NCBI Mus musculus genes as a  
30 reference list. KEGG pathway analysis was performed using the KEGG Mapper – Search  
31 Pathway function ([https://www.genome.jp/kegg/tool/map\\_pathway2.html](https://www.genome.jp/kegg/tool/map_pathway2.html)). We performed a  
32 manual literature search to determine the proportion of significantly changing genes associated  
33 with cancer progression and metastasis.

1    **Accession Numbers**

2

3    The Gene Expression Omnibus accession number for the RNA-sequencing data reported in this  
4    study is GSE148514.

5

6    **Acknowledgements**

7

8    We thank members of the Hadjantonakis and Massagué labs for critical discussions and  
9    comments on the manuscript. We also thank members of MSKCC's Mouse Genetics and  
10   Integrated Genomics Operation (IGO) and Bioinformatics Core facilities. All cores are funded by  
11   the NCI Cancer Center Support Grant (CCSG, P30 CA08748) and IGO is additionally funded by  
12   Cycle for Survival, and the Marie-Josée and Henry R. Kravis Center for Molecular Oncology.  
13   SMM is supported by a Wellcome Trust Sir Henry Wellcome postdoctoral fellowship under the  
14   supervision of JN and AKH. Work in the Hadjantonakis lab was supported by grants from the  
15   NIH (R01HD094868, R01DK084391 and P30CA008748).

16

17   **Ethics**

18   Animal experimentation: Animal experimentation: All mice used in this study were maintained in  
19   accordance with the guidelines of the Memorial Sloan Kettering Cancer Center (MSKCC)  
20   Institutional Animal Care and Use Committee (IACUC) under protocol number 03-12-017 (PI  
21   Hadjantonakis).

22

23

24

## 1 References

- 2
- 3 Ahmed, A. R., Griffiths, A. B., Tilby, M. T., Westley, B. R., & May, F. E. (2012). TFF3 is a normal  
4 breast epithelial protein and is associated with differentiated phenotype in early breast  
5 cancer but predisposes to invasion and metastasis in advanced disease. *American*  
6 *Journal of Pathology*, 180(3), 904-916. doi:10.1016/j.ajpath.2011.11.022
- 7 Aiello, N. M., Maddipati, R., Norgard, R. J., Balli, D., Li, J. Y., Yuan, S., . . . Stanger, B. Z.  
8 (2018). EMT Subtype Influences Epithelial Plasticity and Mode of Cell Migration.  
9 *Developmental Cell*, 45(6), 681-+. doi:10.1016/j.devcel.2018.05.027
- 10 Aiello, N. M., & Stanger, B. Z. (2016). Echoes of the embryo: using the developmental biology  
11 toolkit to study cancer. *Disease Models & Mechanisms*, 9(2), 105-114.  
12 doi:10.1242/dmm.023184
- 13 Ajona, D., Ortiz-Espinosa, S., Pio, R., & Lecanda, F. (2019). Complement in Metastasis: A  
14 Comp in the Camp. *Frontiers in Immunology*, 10. doi:ARTN 669  
15 10.3389/fimmu.2019.00669
- 16 Arai, A., Yamamoto, K., & Toyama, J. (1997). Murine cardiac progenitor cells require visceral  
17 embryonic endoderm and primitive streak for terminal differentiation. *Developmental*  
18 *Dynamics*, 210(3), 344-353. doi:Doi 10.1002/(Sici)1097-0177(199711)210:3<344::Aid-  
19 Aja13>3.0.Co;2-A
- 20 Ayollo, D. V., Zhitnyak, I. Y., Vasiliev, J. M., & Gloushankova, N. A. (2009). Rearrangements of  
21 the Actin Cytoskeleton and E-Cadherin-Based Adherens Junctions Caused by Neoplastic  
22 Transformation Change Cell-Cell Interactions. *Plos One*, 4(11). doi:ARTN e8027  
23 10.1371/journal.pone.0008027
- 24 Bachir, A. I., Horwitz, A. R., Nelson, W. J., & Bianchini, J. M. (2017). Actin-Based Adhesion  
25 Modules Mediate Cell Interactions with the Extracellular Matrix and Neighboring Cells.  
26 *Cold Spring Harbor Perspectives in Biology*, 9(7). doi:ARTN a023234  
27 10.1101/cshperspect.a023234
- 28 Balmer, S., Nowotschin, S., & Hadjantonakis, A. K. (2016). Notochord morphogenesis in mice:  
29 Current understanding & open questions. *Dev Dyn*, 245(5), 547-557.  
30 doi:10.1002/dvdy.24392
- 31 Behringer, R., Gertsenstein, M., Vintersten Nagy, K., & Nagy, A. (2014). *Manipulating the*  
32 *Mouse Embryo: A Laboratory Manual, Fourth Edition* (Vol. 4): Cold Spring Harbor  
33 Laboratory Press.
- 34 Belaousoff, M., Farrington, S. M., & Baron, M. H. (1998). Hematopoietic induction and  
35 respecification of A-P identity by visceral endoderm signaling in the mouse embryo.  
36 *Development*, 125(24), 5009-5018. Retrieved from <Go to  
37 ISI>://WOS:000077976000015
- 38 Blockus, H., & Chedotal, A. (2016). Slit-Robo signaling. *Development*, 143(17), 3037-3044.  
39 doi:10.1242/dev.132829
- 40 Bradley, A., Anastassiadis, K., Ayadi, A., Battey, J. F., Bell, C., Birling, M. C., . . . Wurst, W.  
41 (2012). The mammalian gene function resource: the international knockout mouse  
42 consortium. *Mammalian Genome*, 23(9-10), 580-586. doi:10.1007/s00335-012-9422-2
- 43 Byrd, N., Becker, S., Maye, P., Narasimhaiah, R., St-Jacques, B., Zhang, X. Y., . . . Gabel, L.  
44 (2002). Hedgehog is required for murine yolk sac angiogenesis. *Development*, 129(2),  
45 361-372. Retrieved from <Go to ISI>://WOS:000173759100009
- 46 Cancer Genome Atlas Research Network. Electronic address, a. a. d. h. e., & Cancer Genome  
47 Atlas Research, N. (2017). Integrated Genomic Characterization of Pancreatic Ductal  
48 Adenocarcinoma. *Cancer Cell*, 32(2), 185-203 e113. doi:10.1016/j.ccell.2017.07.007
- 49 Caswell, D. R., Chuang, C. H., Ma, R. K., Winters, I. P., Snyder, E. L., & Winslow, M. M. (2018).  
50 Tumor Suppressor Activity of Selenbp1, a Direct Nkx2-1 Target, in Lung



- 1 Adenocarcinoma. *Mol Cancer Res*, 16(11), 1737-1749. doi:10.1158/1541-7786.MCR-18-  
2 0392
- 3 Chang, H., Dong, T., Ma, X., Zhang, T., Chen, Z., Yang, Z., & Zhang, Y. (2015). Spondin 1  
4 promotes metastatic progression through Fak and Src dependent pathway in human  
5 osteosarcoma. *Biochem Biophys Res Commun*, 464(1), 45-50.  
6 doi:10.1016/j.bbrc.2015.05.092
- 7 Chen, Q., Yao, Y. T., Xu, H., Chen, Y. B., Gu, M., Cai, Z. K., & Wang, Z. (2016). SPOCK1  
8 promotes tumor growth and metastasis in human prostate cancer. *Drug Des Devel Ther*,  
9 10, 2311-2321. doi:10.2147/DDDT.S91321
- 10 Chen, X. Y., Kojima, S., Borisy, G. G., & Green, K. J. (2003). p120 catenin associates with  
11 kinesin and facilitates the transport of cadherin-catenin complexes to intercellular  
12 junctions. *Journal of Cell Biology*, 163(3), 547-557. doi:10.1083/jcb.200305137
- 13 Chou, R. H., Wen, H. C., Liang, W. G., Lin, S. C., Yuan, H. W., Wu, C. W., & Chang, W. S. W.  
14 (2012). Suppression of the invasion and migration of cancer cells by SERPINB family  
15 genes and their derived peptides. *Oncology Reports*, 27(1), 238-245.  
16 doi:10.3892/or.2011.1497
- 17 Chung, Y. C., Wei, W. C., Huang, S. H., Shih, C. M., Hsu, C. P., Chang, K. J., & Chao, W. T.  
18 (2014). Rab11 regulates E-cadherin expression and induces cell transformation in  
19 colorectal carcinoma. *Cancer Research*, 74(19). doi:10.1158/1538-7445.Am2014-3166
- 20 Cofre, J., & Abdelhay, E. (2017). Cancer Is to Embryology as Mutation Is to Genetics:  
21 Hypothesis of the Cancer as Embryological Phenomenon. *ScientificWorldJournal*, 2017,  
22 3578090. doi:10.1155/2017/3578090
- 23 Conlon, R. A., & Rossant, J. (1992). Exogenous retinoic acid rapidly induces anterior ectopic  
24 expression of murine Hox-2 genes in vivo. *Development*, 116(2), 357-368. Retrieved  
25 from <https://www.ncbi.nlm.nih.gov/pubmed/1363087>
- 26 Damert, A., Miquerol, L., Gertsenstein, M., Risau, W., & Nagy, A. (2002). Insufficient VEGFA  
27 activity in yolk sac endoderm compromises haematopoietic and endothelial  
28 differentiation. *Development*, 129(8), 1881-1892. Retrieved from <Go to  
29 ISI>://WOS:000175473800008
- 30 Deady, L. D., Li, W., & Sun, J. (2017). The zinc-finger transcription factor Hindsight regulates  
31 ovulation competency of Drosophila follicles. *Elife*, 6. doi:10.7554/eLife.29887
- 32 Deng, Y. N., Xia, Z. J., Zhang, P., Ejaz, S., & Liang, S. F. (2020). Transcription Factor RREB1:  
33 from Target Genes towards Biological Functions. *International Journal of Biological  
34 Sciences*, 16(8), 1463-1473. doi:10.7150/ijbs.40834
- 35 Dobin, A., Davis, C. A., Schlesinger, F., Drenkow, J., Zaleski, C., Jha, S., . . . Gingeras, T. R.  
36 (2013). STAR: ultrafast universal RNA-seq aligner. *Bioinformatics*, 29(1), 15-21.  
37 doi:10.1093/bioinformatics/bts635
- 38 Dyer, M. A., Farrington, S. M., Mohn, D., Munday, J. R., & Baron, M. H. (2001). Indian  
39 hedgehog activates hematopoiesis and vasculogenesis and can respecify prospective  
40 neurectodermal cell fate in the mouse embryo. *Development*, 128(10), 1717-1730.  
41 Retrieved from <Go to ISI>://WOS:000169057400002
- 42 Elson, E. L. (1988). Cellular Mechanics as an Indicator of Cytoskeletal Structure and Function.  
43 *Annual Review of Biophysics and Biophysical Chemistry*, 17, 397-430. Retrieved from  
44 <Go to ISI>://WOS:A1988P532200018
- 45 Engstrom, P. G., Steijger, T., Sipos, B., Grant, G. R., Kahles, A., Ratsch, G., . . . Consortium, R.  
46 (2013). Systematic evaluation of spliced alignment programs for RNA-seq data. *Nature  
47 Methods*, 10(12), 1185-+. doi:10.1038/Nmeth.2722
- 48 Ferrara, G., & De Vanna, A. C. (2016). Fluorescence In Situ Hybridization for Melanoma  
49 Diagnosis: A Review and a Reappraisal. *American Journal of Dermatopathology*, 38(4),  
50 253-269. doi:10.1097/Dad.0000000000000380

- 1 FujimotoNishiyama, A., Ishii, S., Matsuda, S., Inoue, J., & Yamamoto, T. (1997). A novel zinc  
2 finger protein, Finb, is a transcriptional activator and localized in nuclear bodies. *Gene*,  
3 195(2), 267-275. doi:Doi 10.1016/S0378-1119(97)00172-8
- 4 Gaggioli, C. (2008). Collective invasion of carcinoma cells When the fibroblasts take the lead.  
5 *Cell Adhesion & Migration*, 2(1), 45-47. doi:10.4161/cam.2.1.5705
- 6 Gaggioli, C., Hooper, S., Hidalgo-Carcedo, C., Grosse, R., Marshall, J. F., Harrington, K., &  
7 Sahai, E. (2007). Fibroblast-led collective invasion of carcinoma cells with differing roles  
8 for RhoGTPases in leading and following cells. *Nature Cell Biology*, 9(12), 1392-U1392.  
9 doi:10.1038/ncb1658
- 10 Gara, R. K., Kumari, S., Ganju, A., Yallapu, M. M., Jaggi, M., & Chauhan, S. C. (2015).  
11 Slit/Robo pathway: a promising therapeutic target for cancer. *Drug Discov Today*, 20(1),  
12 156-164. doi:10.1016/j.drudis.2014.09.008
- 13 Gavara, N., & Chadwick, R. (2016). Relationship between cell stiffness and stress fiber amount,  
14 assessed by simultaneous atomic force microscopy and live-cell fluorescence imaging.  
15 *Biomechanics and Modeling in Mechanobiology*, 15(3), 511-523. doi:10.1007/s10237-  
16 015-0706-9
- 17 George, J. T., Jolly, M. K., Xu, S., Somarelli, J. A., & Levine, H. (2017). Survival Outcomes in  
18 Cancer Patients Predicted by a Partial EMT Gene Expression Scoring Metric. *Cancer*  
19 *Res*, 77(22), 6415-6428. doi:10.1158/0008-5472.CAN-16-3521
- 20 Girardi, G., Yarilin, D., Thurman, J. M., Holers, V. M., & Salmon, J. E. (2006). Complement  
21 activation induces dysregulation of angiogenic factors and causes fetal rejection and  
22 growth restriction. *Journal of Experimental Medicine*, 203(9), 2165-2175.  
23 doi:10.1084/jem.20061022
- 24 Gloushankova, N. A., Rubtsova, S. N., & Zhitnyak, I. Y. (2017). Cadherin-mediated cell-cell  
25 interactions in normal and cancer cells. *Tissue Barriers*, 5(3), e1356900.  
26 doi:10.1080/21688370.2017.1356900
- 27 Goldie, L. C., Nix, M. K., & Hirschi, K. K. (2008). Embryonic vasculogenesis and hematopoietic  
28 specification. *Organogenesis*, 4(4), 257-263. doi:10.4161/org.4.4.7416
- 29 Grady, M. E., Composto, R. J., & Eckmann, D. M. (2016). Cell elasticity with altered cytoskeletal  
30 architectures across multiple cell types. *Journal of the Mechanical Behavior of*  
31 *Biomedical Materials*, 61, 197-207. doi:10.1016/j.jmbbm.2016.01.022
- 32 Han, M. K. L., & de Rooij, J. (2017). Resolving the cadherin-F-actin connection. *Nature Cell*  
33 *Biology*, 19(1), 14-16. doi:10.1038/ncb3457
- 34 Han, Y. L., Pegoraro, A. F., Li, H., Li, K. F., Yuan, Y., Xu, G. Q., . . . Guo, M. (2020). Cell  
35 swelling, softening and invasion in a three-dimensional breast cancer model. *Nature*  
36 *Physics*, 16(1), 101-+. doi:10.1038/s41567-019-0680-8
- 37 Hui, B. Q., Ji, H., Xu, Y. T., Wang, J., Ma, Z. H., Zhang, C. G., . . . Zhou, Y. (2019). RREB1-  
38 induced upregulation of the lncRNA AGAP2-AS1 regulates the proliferation and  
39 migration of pancreatic cancer partly through suppressing ANKRD1 and ANGPTL4. *Cell*  
40 *Death & Disease*, 10. doi:ARTN 207  
41 10.1038/s41419-019-1384-9
- 42 Ivanov, A. I., Parkos, C. A., & Nusrat, A. (2010). Cytoskeletal Regulation of Epithelial Barrier  
43 Function During Inflammation. *American Journal of Pathology*, 177(2), 512-524.  
44 doi:10.2353/ajpath.2010.100168
- 45 Jia, D. Y., Jolly, M. K., Boareto, M., Parsana, P., Mooney, S. M., Pienta, K. J., . . . Ben-Jacob, E.  
46 (2015). OVOL guides the epithelial-hybrid-mesenchymal transition. *Oncotarget*, 6(17),  
47 15436-15448. doi:DOI 10.18632/oncotarget.3623
- 48 Jolly, M. K., Boareto, M., Huang, B., Jia, D. Y., Lu, M. Y., Ben-Jacob, E., . . . Levine, H. (2015).  
49 Implications of the hybrid epithelial/mesenchymal phenotype in metastasis. *Frontiers in*  
50 *Oncology*, 5. doi:UNSP 155  
51 10.3389/fonc.2015.00155

- 1 Katsantonis, J., Tosca, A., Koukouritaki, S. B., Theodoropoulos, P. A., Gravanis, A., &  
2 Stournaras, C. (1994). Differences in the G/Total Actin Ratio and Microfilament Stability  
3 between Normal and Malignant Human Keratinocytes. *Cell Biochemistry and Function*,  
4 12(4), 267-274. doi:DOI 10.1002/cbf.290120407
- 5 Kent, O. A., Sandi, M. J., Burston, H. E., Brown, K. R., & Rottapel, R. (2017). An oncogenic  
6 KRAS transcription program activates the RHOGEF ARHGEF2 to mediate transformed  
7 phenotypes in pancreatic cancer. *Oncotarget*, 8(3), 4484-4500.  
8 doi:10.18632/oncotarget.13152
- 9 Ketene, A. N., Roberts, P. C., Shea, A. A., Schmelz, E. M., & Agah, M. (2012). Actin filaments  
10 play a primary role for structural integrity and viscoelastic response in cells. *Integr Biol*  
11 (*Camb*), 4(5), 540-549. doi:10.1039/c2ib00168c
- 12 Kim, M., Du, O. Y., Whitney, R. J., Wilk, R., Hu, J., Krause, H. M., . . . Reed, B. H. (2020). A  
13 Functional Analysis of the Drosophila Gene hindsight: Evidence for Positive Regulation  
14 of EGFR Signaling. *G3-Genes Genomes Genetics*, 10(1), 117-127.  
15 doi:10.1534/g3.119.400829
- 16 Kim, W. K., Kwon, Y., Jang, M., Park, M., Kim, J., Cho, S., . . . Kim, H. (2019). beta-catenin  
17 activation down-regulates cell-cell junction-related genes and induces epithelial-to-  
18 mesenchymal transition in colorectal cancers. *Sci Rep*, 9(1), 18440.  
19 doi:10.1038/s41598-019-54890-9
- 20 Kofler, N. M., Shawber, C. J., Kangsamaksin, T., Reed, H. O., Galatioto, J., & Kitajewski, J.  
21 (2011). Notch signaling in developmental and tumor angiogenesis. *Genes Cancer*, 2(12),  
22 1106-1116. doi:10.1177/1947601911423030
- 23 Kovac, B., Makela, T. P., & Vallenius, T. (2018). Increased alpha-actinin-1 destabilizes E-  
24 cadherin-based adhesions and associates with poor prognosis in basal-like breast  
25 cancer. *Plos One*, 13(5), e0196986. doi:10.1371/journal.pone.0196986
- 26 Kwon, G. S., Fraser, S. T., Eakin, G. S., Mangano, M., Isern, J., Sahr, K. E., . . . Baron, M. H.  
27 (2006). Tg(Afp-GFP) expression marks primitive and definitive endoderm lineages  
28 during mouse development. *Dev Dyn*, 235(9), 2549-2558. doi:10.1002/dvdy.20843
- 29 Kwon, G. S., Viotti, M., & Hadjantonakis, A. K. (2008). The endoderm of the mouse embryo  
30 arises by dynamic widespread intercalation of embryonic and extraembryonic lineages.  
31 *Developmental Cell*, 15(4), 509-520. doi:10.1016/j.devcel.2008.07.017
- 32 Li, X. M., Wang, J. J., Zhang, C., Lin, C., Zhang, J. M., Zhang, W., . . . Li, X. N. (2018). Circular  
33 RNA circITGA7 inhibits colorectal cancer growth and metastasis by modulating the Ras  
34 pathway and upregulating transcription of its host gene ITGA7. *Journal of Pathology*,  
35 246(2), 166-179. doi:10.1002/path.5125
- 36 Liang, O. D., Korff, T., Eckhardt, J., Rifaat, J., Baal, N., Herr, F., . . . Zygmunt, M. (2004).  
37 Oncodevelopmental alpha-fetoprotein acts as a selective proangiogenic factor on  
38 endothelial cell from the fetomaternal unit. *Journal of Clinical Endocrinology &*  
39 *Metabolism*, 89(3), 1415-1422. doi:10.1210/jc.2003-031721
- 40 Liang, X., Gomez, G. A., & Yap, A. S. (2015). Current perspectives on cadherin-cytoskeleton  
41 interactions and dynamics. *Cell Health and Cytoskeleton*, 7, 11-24.  
42 doi:10.2147/Chc.S76107
- 43 Liu, X., Zhou, Z. H., Li, W., Zhang, S. K., Li, J., Zhou, M. J., & Song, J. W. (2019). Heparanase  
44 Promotes Tumor Growth and Liver Metastasis of Colorectal Cancer Cells by Activating  
45 the p38/MMP1 Axis. *Frontiers in Oncology*, 9, 216. doi:10.3389/fonc.2019.00216
- 46 Mary, S., Charrasse, S., Meriane, M., Comunale, F., Travo, P., Blangy, A., & Gauthier-Rouviere,  
47 C. (2002). Biogenesis of N-cadherin-dependent cell-cell contacts in living fibroblasts is a  
48 microtubule-dependent kinesin-driven mechanism. *Molecular Biology of the Cell*, 13(1),  
49 285-301. doi:DOI 10.1091/mbc.01-07-0337

- 1 Mege, R. M., & Ishiyama, N. (2017). Integration of Cadherin Adhesion and Cytoskeleton at  
2 Adherens Junctions. *Cold Spring Harbor Perspectives in Biology*, 9(5). doi:ARTN  
3 a028738  
4 10.1101/cshperspect.a028738
- 5 Melani, M., Simpson, K. J., Brugge, J. S., & Montell, D. (2008). Regulation of cell adhesion and  
6 collective cell migration by hindsight and its human homolog RREB1. *Curr Biol*, 18(7),  
7 532-537. doi:10.1016/j.cub.2008.03.024
- 8 Ming, L., Wilk, R., Reed, B. H., & Lipshitz, H. D. (2013). Drosophila Hindsight and mammalian  
9 RREB-1 are evolutionarily conserved DNA-binding transcriptional attenuators.  
10 *Differentiation*, 86(4-5), 159-170. doi:10.1016/j.diff.2013.12.001
- 11 Miura, Y., & Wilt, F. H. (1969). Tissue interaction and the formation of the first erythroblasts of  
12 the chick embryo. *Dev Biol*, 19(2), 201-211. doi:10.1016/0012-1606(69)90055-4
- 13 Morgani, S. M., Metzger, J. J., Nichols, J., Siggia, E. D., & Hadjantonakis, A. K. (2018).  
14 Micropattern differentiation of mouse pluripotent stem cells recapitulates embryo  
15 regionalized cell fate patterning. *Elife*, 7. doi:ARTN e32839  
16 10.7554/eLife.32839
- 17 Morgani, S. M., Saiz, N., Garg, V., Raina, D., Simon, C. S., Kang, M., . . . Hadjantonakis, A. K.  
18 (2018). A Sprouty4 reporter to monitor FGF/ERK signaling activity in ESCs and mice.  
19 *Dev Biol*, 441(1), 104-126. doi:10.1016/j.ydbio.2018.06.017
- 20 Moser, M., & Patterson, C. (2003). Thrombin and vascular development: a sticky subject.  
21 *Arterioscler Thromb Vasc Biol*, 23(6), 922-930.  
22 doi:10.1161/01.ATV.0000065390.43710.F2
- 23 Mukhopadhyay, N. K., Cinar, B., Mukhopadhyay, L., Lutchman, M., Ferdinand, A. S., Kim, J., . .  
24 . Freeman, M. R. (2007). The zinc finger protein ras-responsive element binding protein-  
25 1 is a coregulator of the androgen receptor: implications for the role of the ras pathway in  
26 enhancing androgenic signaling in prostate cancer. *Molecular Endocrinology*, 21(9),  
27 2056-2070. doi:10.1210/me.2006-0503
- 28 Nowotschin, S., Setty, M., Kuo, Y. Y., Liu, V., Garg, V., Sharma, R., . . . Pe'er, D. (2019). The  
29 emergent landscape of the mouse gut endoderm at single-cell resolution. *Nature*,  
30 569(7756), 361-+. doi:10.1038/s41586-019-1127-1
- 31 Oliva, C., Molina-Fernandez, C., Maureira, M., Candia, N., Lopez, E., Hassan, B., . . . Sierralta,  
32 J. (2015). Hindsight regulates photoreceptor axon targeting through transcriptional  
33 control of jitterbug/Filamin and multiple genes involved in axon guidance in Drosophila.  
34 *Developmental Neurobiology*, 75(9), 1018-1032. doi:10.1002/dneu.22271
- 35 Pandey, V., Wu, Z. S., Zhang, M., Li, R., Zhang, J., Zhu, T., & Lobie, P. E. (2014). Trefoil factor  
36 3 promotes metastatic seeding and predicts poor survival outcome of patients with  
37 mammary carcinoma. *Breast Cancer Res*, 16(5), 429. doi:10.1186/s13058-014-0429-3
- 38 Pickup, A. T., Lamka, M. L., Sun, Q., Yip, M. L., & Lipshitz, H. D. (2002). Control of  
39 photoreceptor cell morphology, planar polarity and epithelial integrity during Drosophila  
40 eye development. *Development*, 129(9), 2247-2258. Retrieved from  
41 <https://www.ncbi.nlm.nih.gov/pubmed/11959832>
- 42 Pijuan-Sala, B., Griffiths, J. A., Guibentif, C., Hiscock, T. W., Jawaid, W., Calero-Nieto, F. J., . . .  
43 Gottgens, B. (2019). A single-cell molecular map of mouse gastrulation and early  
44 organogenesis. *Nature*, 566(7745), 490-+. doi:10.1038/s41586-019-0933-9
- 45 Pilot, F., Philippe, J. M., Lemmers, C., & Lecuit, T. (2006). Spatial control of actin organization at  
46 adherens junctions by the synaptotagmin-like protein Btsz. *Nature*, 442(7102), 580-584.  
47 doi:10.1038/nature04935
- 48 Poltavets, V., Kochetkova, M., Pitson, S. M., & Samuel, M. S. (2018). The Role of the  
49 Extracellular Matrix and Its Molecular and Cellular Regulators in Cancer Cell Plasticity.  
50 *Frontiers in Oncology*, 8. doi:ARTN 431  
51 10.3389/fonc.2018.00431

- 1 Reed, B. H., Wilk, R., & Lipshitz, H. D. (2001). Downregulation of Jun kinase signaling in the  
2 amnioserosa is essential for dorsal closure of the *Drosophila* embryo. *Current Biology*,  
3 11(14), 1098-1108. doi:Doi 10.1016/S0960-9822(01)00318-9
- 4 Rodriguez, C. I., Buchholz, F., Galloway, J., Sequerra, R., Kasper, J., Ayala, R., . . . Dymecki, S.  
5 M. (2000). High-efficiency deleter mice show that FLPe is an alternative to Cre-loxP.  
6 *Nature Genetics*, 25(2), 139-140. doi:Doi 10.1038/75973
- 7 Romanienko, P. J., Giacalone, J., Ingenito, J., Wang, Y. J., Isaka, M., Johnson, T., . . . Mark, W.  
8 H. (2016). A vector with a single promoter for in vitro transcription and mammalian cell  
9 expression of CRISPR gRNAs. *Transgenic Research*, 25(2), 259-259. Retrieved from  
10 <Go to ISI>://WOS:000371155900158
- 11 Saitoh, M. (2018). Involvement of partial EMT in cancer progression. *Journal of Biochemistry*,  
12 164(4), 257-264. doi:10.1093/jb/mvy047
- 13 Sako-Kubota, K., Tanaka, N., Nagae, S., Meng, W. X., & Takeichi, M. (2014). Minus end-  
14 directed motor KIFC3 suppresses E-cadherin degradation by recruiting USP47 to  
15 adherens junctions. *Molecular Biology of the Cell*, 25(24), 3851-3860.  
16 doi:10.1091/mbc.E14-07-1245
- 17 Saxena, K., Srikrishnan, S., Celia-Terrassa, T., & Jolly, M. K. (2020). OVOL1/2: Drivers of  
18 Epithelial Differentiation in Development, Disease, and Reprogramming. *Cells Tissues  
19 Organs*, 1-10. doi:10.1159/000511383
- 20 Schott, M., de Jel, M. M., Engelmann, J. C., Renner, P., Geissler, E. K., Bosserhoff, A. K., &  
21 Kuphal, S. (2018). Selenium-binding protein 1 is down-regulated in malignant  
22 melanoma. *Oncotarget*, 9(12), 10445-10456. doi:10.18632/oncotarget.23853
- 23 Sha, Y. T., Haensel, D., Gutierrez, G., Du, H. J., Dai, X., & Nie, Q. (2019). Intermediate cell  
24 states in epithelial-to-mesenchymal transition. *Physical Biology*, 16(2). doi:ARTN 021001  
25 10.1088/1478-3975/aaf928
- 26 Stehbens, S. J., Paterson, A. D., Crampton, M. S., Shewan, A. M., Ferguson, C., Akhmanova,  
27 A., . . . Yap, A. S. (2006). Dynamic microtubules regulate the local concentration of E-  
28 cadherin at cell-cell contacts. *Journal of Cell Science*, 119(9), 1801-1811.  
29 doi:10.1242/jcs.02903
- 30 Su, J., Morgani, S. M., David, C. J., Wang, Q., Er, E. E., Huang, Y. H., . . . Massague, J. (2020).  
31 TGF-beta orchestrates fibrogenic and developmental EMTs via the RAS effector  
32 RREB1. *Nature*, 577(7791), 566-571. doi:10.1038/s41586-019-1897-5
- 33 Sun, B., Fang, Y. T., Li, Z. Y., Chen, Z. Y., & Xiang, J. B. (2015). Role of cellular cytoskeleton in  
34 epithelial-mesenchymal transition process during cancer progression. *Biomedical  
35 Reports*, 3(5), 603-610. doi:10.3892/br.2015.494
- 36 Sun, J. J., & Deng, W. M. (2007). Hindsight mediates the role of Notch in suppressing hedgehog  
37 signaling and cell proliferation. *Developmental Cell*, 12(3), 431-442.  
38 doi:10.1016/j.devcel.2007.02.003
- 39 Suresh, S. (2007). Nanomedicine - Elastic clues in cancer detection. *Nature Nanotechnology*,  
40 2(12), 748-749. doi:10.1038/nnano.2007.397
- 41 Takahashi, Y., Ohta, T., & Mai, M. (2004). Angiogenesis of AFP producing gastric carcinoma:  
42 correlation with frequent liver metastasis and its inhibition by anti-AFP antibody.  
43 *Oncology Reports*, 11(4), 809-813. Retrieved from  
44 <https://www.ncbi.nlm.nih.gov/pubmed/15010877>
- 45 Teng, O., Rai, T., Tanaka, Y., Takei, Y., Nakata, T., Hirasawa, M., . . . Hirokawa, N. (2005). The  
46 KIF3 motor transports N-cadherin and organizes the developing neuroepithelium. *Cell  
47 Structure and Function*, 30, 67-67. Retrieved from <Go to ISI>://WOS:000202995600210
- 48 Tesar, P. J., Chenoweth, J. G., Brook, F. A., Davies, T. J., Evans, E. P., Mack, D. L., . . .  
49 McKay, R. D. G. (2007). New cell lines from mouse epiblast share defining features with  
50 human embryonic stem cells. *Nature*, 448(7150), 196-U110. doi:10.1038/nature05972

- 1 Thiagalingam, A., DeBustros, A., Borges, M., Jasti, R., Compton, D., Diamond, L., . . . Nelkin, B.  
2 D. (1996). RREB-1, a novel zinc finger protein, is involved in the differentiation response  
3 to ras in human medullary thyroid carcinomas. *Molecular and Cellular Biology*, 16(10),  
4 5335-5345. Retrieved from <Go to ISI>://WOS:A1996VH85200011
- 5 Vasileva, E., & Citi, S. (2018). The role of microtubules in the regulation of epithelial junctions.  
6 *Tissue Barriers*, 6(3). doi:ARTN e1539596  
7 10.1080/21688370.2018.1539596
- 8 Wang, K., Song, Y., Liu, W., Wu, X. H., Zhang, Y. K., Li, S. H., . . . Yang, C. (2017). The  
9 noncoding RNA linc-ADAMTS5 cooperates with RREB1 to protect from intervertebral  
10 disc degeneration through inhibiting ADAMTS5 expression. *Clinical Science*, 131(10),  
11 965-979. doi:10.1042/Cs20160918
- 12 Wang, K., Xu, C., Li, W. J., & Ding, L. (2018). Emerging clinical significance of claudin-7 in  
13 colorectal cancer: a review. *Cancer Management and Research*, 10, 3741-3752.  
14 doi:10.2147/Cmar.S175383
- 15 Wieschaus, E., Nussleinvolhard, C., & Jurgens, G. (1984). Mutations Affecting the Pattern of the  
16 Larval Cuticle in *Drosophila-Melanogaster*. 3. Zygotic Loci on the X-Chromosome and  
17 4th Chromosome. *Wilhelm Roux's Archives of Developmental Biology*, 193(5), 296-307.  
18 doi:Doi 10.1007/Bf00848158
- 19 Wilk, R., Pickup, A. T., Hamilton, J. K., Reed, B. H., & Lipshitz, H. D. (2004). Dose-sensitive  
20 autosomal autonomous and tissue nuclear modifiers identify candidate genes for tissue  
21 nonautonomous regulation by the *Drosophila* zinc-finger protein, hindsight. *Genetics*,  
22 168(1), 281-300. doi:10.1534/genetics.104.031344
- 23 Wilk, R., Reed, B. H., Tepass, U., & Lipshitz, H. D. (2000). The hindsight gene is required for  
24 epithelial maintenance and differentiation of the tracheal system in *Drosophila*. *Dev Biol*,  
25 219(2), 183-196. doi:10.1006/dbio.2000.9619
- 26 Wilt, F. H. (1965). Erythropoiesis in the Chick Embryo: The Role of Endoderm. *Science*,  
27 147(3665), 1588-1590. doi:10.1126/science.147.3665.1588
- 28 Xu, W. W., Mezencev, R., Kim, B., Wang, L. J., McDonald, J., & Sulchek, T. (2012). Cell  
29 Stiffness Is a Biomarker of the Metastatic Potential of Ovarian Cancer Cells. *Plos One*,  
30 7(10). doi:ARTN e46609  
31 10.1371/journal.pone.0046609
- 32 Yang, J., Antin, P., Berx, G., Blanpain, C., Brabletz, T., Bronner, M., . . . TEMTIA, E. I. A.  
33 (2020). Guidelines and definitions for research on epithelial-mesenchymal transition.  
34 *Nature Reviews Molecular Cell Biology*, 21(6), 341-352. doi:10.1038/s41580-020-0237-9
- 35 Yao, J. J., Zhong, L., Zhong, P. Q., Liu, D. D., Yuan, Z., Liu, J. M., . . . Liu, B. Z. (2019). RAS-  
36 Responsive Element-Binding Protein 1 Blocks the Granulocytic Differentiation of Myeloid  
37 Leukemia Cells. *Oncology Research*, 27(7), 809-818.  
38 doi:10.3727/096504018x15451301487729  
39  
40  
41  
42  
43  
44  
45

1 **Figure Legends**

2

3 **Figure 1. *Rreb1* is expressed within embryonic and extraembryonic tissues. A.**

4 Wholemout images of *Rreb1*<sup>LacZ/+</sup> mouse embryos from embryonic day (E) 5.5-8.5. Dashed  
5 lines mark approximate plane of transverse sections shown in lower panels. Section iii from  
6 E7.5 is located in Figure S1D. **B.** *Rreb1*<sup>LacZ</sup> reporter mouse embryonic stem cells (mESCs) (i)  
7 and epiblast stem cells (ii) under self-renewing conditions. mESCs were grown in serum/LIF on  
8 feeders. Panels (iii) and (iv) show mESCs after 7 days of differentiation in the absence of LIF or  
9 in the absence of LIF plus 12 ng/ml FGF2. A, anterior; P, posterior; Pr, proximal; Ds, distal; L,  
10 left; R, right; ExM, extraembryonic mesoderm; ExVE, extraembryonic visceral endoderm; AVE,  
11 anterior visceral endoderm; aEpi, anterior epiblast; Meso, mesoderm; Endo, endoderm; Epi,  
12 epiblast; PS, primitive streak; Am, amnion; Al, allantois; Ch, chorion; AxM, axial mesoderm.

13

14 **Figure 2. *Rreb1* is necessary for mouse embryonic development. A.** Schematic diagram

15 showing the strategy used to generate the *Rreb1* mutant allele. CRISPR-Cas9 was used to  
16 delete the majority of the coding DNA sequence of Exon 6. We created a large (approximately  
17 700 bp) and small (approximately 540 bp) deletions. Both lines exhibited comparable  
18 phenotypes, thus we combined these data. UTR, untranslated region. **B-C.** Brightfield images of  
19 *Rreb1*<sup>+/+</sup> and *Rreb1*<sup>-/-</sup> littermates at E10.5 and E11.5 Arrowheads indicate boundary of open  
20 neural tube. Righthand panels show mutant embryos at higher magnification. **D-E.** Confocal  
21 maximum intensity projection (MIP) of wholemount E9.0 and 9.5 mouse embryos, sb 200  $\mu$ m.  
22 Somite pair numbers (ss) shown on the images. **D.** Right panel shows a MIP frontal view and  
23 outline (dashed line) of the head of the embryo emphasizing the neural tube closure defects in  
24 the *Rreb1*<sup>-/-</sup>. **E.** Box highlights image of posterior neuropore shown in high magnification in  
25 adjacent panel, sb 100  $\mu$ m. **F.** Bar chart summarizing the percentage of *Rreb1*<sup>+/+</sup>, *Rreb1*<sup>+/-</sup> and  
26 *Rreb1*<sup>-/-</sup> embryos recovered at each developmental stage. The first bar indicates the expected  
27 Mendelian ratios of each genotype. N numbers are shown above each bar. D, dorsal; V,  
28 ventral; A, anterior; P, posterior; L, left; R, right; VE, visceral endoderm; ExE, extraembryonic  
29 ectoderm; DE, definitive endoderm; PS, primitive streak; Epi, epiblast; Meso, mesoderm; fb,  
30 forebrain; mb, midbrain; hb, hindbrain; ys, yolk sac.

31

32 **Figure 3. Loss of *Rreb1* causes cardiovascular defects in the early mouse embryo. A.**

33 Schematic diagram depicting the sample collection methodology for whole embryo RNA-seq.  
34 Individual embryos were isolated from the uterus and the parietal endoderm dissected, lysed,

1 and used for genotyping. The remaining part of the embryo was used for RNA extraction.  
2 Following genotyping, 5 individual wild-type and 5 individual mutant embryos were selected for  
3 sequencing. **B.** Graph showing the list of significantly downregulated genes in *Rreb1*<sup>-/-</sup> versus  
4 *Rreb1*<sup>+/+</sup> embryos that were detected via single-cell sequencing in (Pijuan-Sala et al., 2019).  
5 Each gene was manually categorized based on its enrichment in different tissues within this  
6 dataset. 'No enrichment' indicates genes that did not show a tissue-specific expression or  
7 enrichment. Arrow highlights *Afp* and arrowheads highlight genes associated with the  
8 complement and coagulation cascades. **C.** Confocal MIPs of immunostained embryos *Afp*-GFP  
9 ; *Rreb1*<sup>+/+</sup> and *Rreb1*<sup>-/-</sup> embryos. Arrowheads mark highlight the proximal ExVE that, in contrast  
10 to wild-type embryos, shows little to no *Afp*-GFP expression. Sb, 50 μm. **D.** Brightfield images of  
11 E9.5 and 10.5 embryos showing abnormal defects in the vasculature of *Rreb1*<sup>-/-</sup> embryos. In  
12 panel vi, arrowhead highlights the open anterior neural tube. **E.** Confocal maximum intensity  
13 projections of whole E9.5 and 10.5 embryos (Sb, 200 μm) with adjacent high magnification  
14 images of the cranial vasculature (Sb, 50 μm). Boxes i-iv in E9.5 are shown at higher  
15 magnification in Figure S3G. PECAM-1 marks vasculature. ENDOGLIN marks endothelial cells  
16 as well as hematopoietic, mesenchymal and neural stem cells. To note, the tail of the lower right  
17 embryo was damaged during dissection. **F.** Wholemount image of an E10.5 *Rreb1*<sup>LacZ/LacZ</sup>  
18 mutant embryo. Arrowhead highlights pericardial edema. A, anterior; P, posterior; Pr, proximal;  
19 Ds, distal; D, dorsal; V, ventral; L, left; R, right; ExVE, extraembryonic VE; EmVE, embryonic  
20 VE; ys, yolk sac; fb, forebrain; mb, midbrain; hb, hindbrain; BVs, blood vessels; BCs, blood  
21 cells.

22

23 **Figure 4. The *Rreb1*<sup>-/-</sup> epiblast shows altered cytoskeleton and adherens junction**

24 **organization.** **A.** Graph showing the relative expression level of cytoskeleton-associated genes  
25 from RNA-sequencing of individual *Rreb1*<sup>+/+</sup> and *Rreb1*<sup>-/-</sup> embryos. Each point represents a  
26 single embryo. Statistical analysis was performed using an Unpaired *t*-test (\**p*<0.05, \*\**p*<0.005,  
27 \*\*\**p*<0.001). Bars represent median and IQR. Expression is shown relative to the mean  
28 expression in wild-type embryos. **B-E.** Confocal optical sections showing transverse  
29 cryosections of immunostained *Rreb1*<sup>+/+</sup> and *Rreb1*<sup>-/-</sup> embryos. Boxes indicate lateral epiblast  
30 regions shown at higher magnification in adjacent panels. *Rreb1*<sup>-/-</sup> embryos exhibit a punctate  
31 localization of E-CADHERIN. Sb, 10 μm. **C,E.** Highest magnification images showing a small  
32 region of the epiblast epithelium. Sb, 10 μm. Brackets mark the primitive streak. A, anterior; P,  
33 posterior; L, left; R, right.

34



1 **Figure 5. *Rreb1* maintains epithelial organization in the early mouse embryo.** **A.** Sagittal  
2 confocal optical section of the anterior of E7.5 *Rreb1* wild-type and homozygous mutant  
3 embryos. Arrowheads highlight cells abnormally protruding from the VE overlying the epiblast.  
4 Sb, 25  $\mu$ m. **B.** Confocal maximum intensity projections (MIP) of immunostained E7.5 embryos  
5 showing ruffling of the extraembryonic VE. Sb, 100  $\mu$ m. **C.** Confocal optical sections showing  
6 transverse cryosections of E7.5 *Afp*-GFP *Rreb1* wild-type and homozygous mutant embryos.  
7 Boxes indicate regions shown in higher magnification in adjacent panels. Arrowhead indicates  
8 abnormal accumulation of *Afp*<sup>+</sup> VE cells and underlying *Afp*<sup>-</sup> DE cells at the anterior embryonic-  
9 extraembryonic boundary in *Rreb1*<sup>-/-</sup>. Sb, 50  $\mu$ m. **D,E.** Maximum intensity projections (MIPs) of  
10 wholemount E7.5 embryos and confocal optical sections of transverse cryosections. **D.** Dashed  
11 lines mark approximate plane of section. Sb, 50  $\mu$ m. **E.** Dashed yellow line outlines the epiblast.  
12 Sb, 50  $\mu$ m. Asterisks mark abnormal gaps between tissue layers. **F.** Representative images of  
13 *Rreb1*<sup>+/+</sup> and *Rreb1*<sup>-/-</sup> embryos highlighting the epithelial defects observed: (i) abnormal  
14 accumulations of cells in the epiblast, (ii) epiblast folding, in this case the epiblast is folded such  
15 that the putative anterior (aEpi) and posterior (pEpi) regions are adjacent to one another, (iii)  
16 formation of multilayered regions (highlighted with brackets) in the, typically monolayer,  
17 endoderm and epiblast. Sb 25  $\mu$ m, high mag sb, 10  $\mu$ m. **G-I.** Confocal MIPs (G,H) and confocal  
18 optical sections showing transverse cryosections of *Afp*-GFP ; *Rreb1*<sup>+/+</sup> and *Rreb1*<sup>-/-</sup> embryos (I).  
19 Boxes indicate region shown in higher magnification in H. White circles indicate approximate  
20 embryonic-extraembryonic boundary. Sb, 50  $\mu$ m. Pr, proximal; Ds, distal; A, anterior; P,  
21 posterior; R, right; L, left; Epi, epiblast; aEpi, anterior epiblast; pEpi, posterior epiblast; PS,  
22 primitive streak; Endo, endoderm; ACD, allantois core domain; AOM, allantois outer  
23 mesenchyme; Ch, chorion; Meso, mesoderm; ExVE, extraembryonic visceral endoderm; EmVE,  
24 embryonic visceral endoderm; DE, definitive endoderm; NE, neurectoderm; Al, allantois.

25  
26 **Figure 6. Loss of *Rreb1* results in invasive cell behaviors.** **A.** Confocal optical sections of  
27 transverse cryosections of immunostained E7.5 embryos. Boxes show regions displayed at  
28 higher magnification in adjacent panels. Arrowheads indicate ectopic SNAIL expression in  
29 epiblast cells exiting the epithelium. Sb, 25  $\mu$ m. **B.** Confocal optical sections of maximum  
30 intensity projection (MIP, Sb, 50  $\mu$ m) and transverse cryosections of immunostained E6.5  
31 *Rreb1*<sup>-/-</sup> embryos. Dashed lines mark approximate plane of transverse section. Arrowhead  
32 marks ectopic SOX2<sup>+</sup> cells leaving the epiblast and traversing the outer endoderm layer. Sb, 10  
33  $\mu$ m. **C.** Schematic diagram illustrating how chimeras were generated. *Rreb1*<sup>+/+</sup> or *Rreb1*<sup>-/-</sup>  
34 embryonic stem cells (ESCs) constitutively expressing an mCherry lineage label were injected

1 into wild host E3.5 embryos. Embryos were then transferred to pseudopregnant host females  
2 and dissected for analysis at later developmental stages. **D,E.** Sagittal (D i), lateral (D ii) and  
3 transverse (E) confocal optical sections of immunostained E7.5 chimeric embryos containing  
4 either *Rreb1<sup>+/+</sup>* or *Rreb1<sup>-/-</sup>* cells. Arrowheads mark abnormal SOX2<sup>+</sup> cells, expressing higher  
5 levels of SOX2 than their neighbors, in the epiblast (yellow), primitive streak (blue arrowhead) or  
6 between the epiblast and visceral endoderm layers (white). Sb, 50  $\mu$ m. High magnification inset  
7 Sb, 25  $\mu$ m. A, anterior; P, posterior; L, left; R, right; Endo, endoderm; Meso, mesoderm; Epi,  
8 epiblast; PS, primitive streak.

9  
10 **Figure 7. *Rreb1<sup>-/-</sup>* chimeras exhibit changes in ECM organization. A,C,D.** Confocal images  
11 showing transverse cryosections of immunostained E7.5 chimeric embryos containing *Rreb1<sup>+/+</sup>*  
12 or *Rreb1<sup>-/-</sup>* cells. **A.** Confocal optical sections of *Rreb1<sup>-/-</sup>* chimeras. Cherry fluorescence is a  
13 constitutive lineage label marking the progeny of *Rreb1<sup>-/-</sup>* embryonic stem cells (ESCs)  
14 introduced into host embryos. Arrowheads mark ectopic SOX2<sup>+</sup> cells derived from wild-type  
15 host cells (white) or from *Rreb1<sup>-/-</sup>* cells (magenta). Sb, 25  $\mu$ m. **C.** Confocal optical sections of  
16 *Rreb1<sup>-/-</sup>* chimeras. Arrowhead marks ectopic SOX2<sup>+</sup> cells traversing a break in the basement  
17 membrane between the epiblast and outer visceral endoderm layer. Sb, 10  $\mu$ m. **D.** Confocal  
18 optical sections and maximum intensity projections (MIP) of *Rreb1<sup>-/-</sup>* chimeras. Upper and lower  
19 panels are sections taken from the same embryo, 20  $\mu$ m apart. Arrowheads mark invasive  
20 SOX2<sup>+</sup> cells surrounded by Laminin. Dashed line marks the approximate line of measurement  
21 of the length of the adjacent Laminin track. Sb, 25  $\mu$ m and 10  $\mu$ m for high magnification image.  
22 **B.** Graph showing the relative expression level of a panel of ECM- associated genes from RNA-  
23 sequencing of individual *Rreb1<sup>+/+</sup>* and *Rreb1<sup>-/-</sup>* embryos. Each point represents a single embryo.  
24 Statistical analysis was performed using an Unpaired *t*-test (\* $p$ <0.05, \*\* $p$ <0.005, \*\*\* $p$ <0.001).  
25 Bars represent median and IQR. Expression is shown relative to the mean expression in wild-  
26 type embryos. **E.** Graph showing the top 5 results from KEGG pathway analysis of genes that  
27 were significantly upregulated in *Rreb1<sup>-/-</sup>* versus *Rreb1<sup>+/+</sup>* embryos. The genes associated with  
28 each category are shown on the graph. **F.** Schematic diagram summarizing some of the key  
29 findings in this paper. i. In the wild-type epiblast epithelium of the mouse embryo, adherens  
30 junction components, such as E-CADHERIN, form continuous belts along cell junctions and F-  
31 ACTIN forms linear filaments that run parallel to these junctions. ii. In *Rreb1<sup>-/-</sup>* embryos, there  
32 was a reduction in the expression of a cohort of factors secreted by the VE, which may alter the  
33 behavior of epiblast cells. Furthermore, we observed various phenotypes in the *Rreb1<sup>-/-</sup>* epiblast  
34 epithelium including a more variable cell orientation compared to that of wild-type embryos,

1 abnormal accumulations of cells, ectopic expression of the mesenchymal marker SNAIL, and  
2 chains of cells apparently exiting the epithelial layer. iii. The wild-type epiblast epithelium forms  
3 a Laminin basement membrane at its basal surface. iv. In contrast, in chimeric embryos that  
4 contain a mix of both wild-type and *Rreb1*<sup>-/-</sup> cells, we observed cells of both genotypes  
5 traversing breaks in the underlying basement membrane which were then found ectopically  
6 throughout the embryo. Moreover, we observed the formation of long Laminin tracks closely  
7 associated with abnormal SOX2<sup>HI</sup> cells. v. The cell behaviors observed in *Rreb1*<sup>-/-</sup> embryos and  
8 chimeras are similar to those observed in cancer. For example, abnormal accumulations of  
9 epithelial cells are the basis of tumor formation, changes in cytoskeleton organization combined  
10 with a switch from linear to punctate E-CADHERIN and ectopic expression of mesenchymal  
11 markers characterizes an intermediate EMT state that is associated with collective invasion  
12 during cancer metastasis. Remodeling of the ECM into parallel fibers, known as ECM  
13 microtracks, facilitates collective cell invasion in cancer metastasis. Furthermore, the tumor  
14 microenvironment commonly show a change in the expression of secreted factors that promote  
15 angiogenesis. A, anterior; P, posterior; L, left; R, right; Pr, proximal; Ds, distal; Epi, epiblast;  
16 Endo, endoderm; ExE, extraembryonic ectoderm; Meso, mesoderm.

17  
18

## 1 Supplemental Figure Legends

2

3 **Figure S1. *Rreb1* expression pattern during mouse embryonic development. A.** *Rreb1*  
4 expression in different cell types of the early mouse embryo, from published single-cell RNA-  
5 sequencing datasets. Left panel: Force-directed layout plot showing relative *Rreb1* expression  
6 in cells of E3.5-4.5 pre-implantation and E5.5 early post-implantation embryos from single cell  
7 sequencing (sc seq.) data. Plot was generated using data from Nowotschin et al. (Nowotschin et  
8 al., 2019). Right panel: Uniform manifold approximation and projection (UMAP) plot, generated  
9 using single cell sequencing data from Pijuan-Sala et al. (Pijuan-Sala et al., 2019), showing  
10 *Rreb1* expression levels in all the cells at E6.5, 6.75, 7.0 and 7.75. **B.** Schematic diagram  
11 showing the original EUCOMM knockout-first (Tm1a) allele (upper panel) and the *Rreb1* null  
12 LacZ reporter (Tm1b) allele generated by Cre-mediated recombination of Tm1a (lower panel).  
13 *Engrailed 2* splice acceptor (En2 SA), internal ribosome entry site (IRES), human beta actin  
14 promoter (hbactP), Neomycin cassette (neo), single polyadenylation sequences (pA), *FRT* sites  
15 (green triangles), *loxP* sites (orange triangles). **C.** Wholemound images of E4.5 *Rreb1*<sup>LacZ/+</sup>  
16 reporter blastocysts. **D.** Transverse cryosection through a distal region of an E7.5 *Rreb1*<sup>LacZ/+</sup>  
17 reporter embryos from Figure 1A. Arrowhead indicates expression within the distal anterior  
18 epiblast. **E-G.** Wholemound images of *Rreb1*<sup>LacZ/+</sup> reporter embryos. **H.** Transverse cryosection  
19 of the yolk sac of an E10.5 *Rreb1*<sup>LacZ/+</sup> reporter embryo. **I.** Wholemound images of wild-type  
20 embryos following in situ hybridization with sense (control) and antisense probes against *Rreb1*.  
21 TE, trophoctoderm; ICM, inner cell mass; PrE, primitive endoderm; VE, visceral endoderm; ExE,  
22 extraembryonic ectoderm; PS, primitive streak; DE, definitive endoderm; Epi, epiblast; Noto,  
23 notochord; Meso, mesoderm; ne, neurectoderm; pcp, prechordal plate; Pr, proximal; Ds, distal;  
24 A, anterior; P, posterior; L, left; R, right; ExVE, extraembryonic visceral endoderm; Ch, chorion;  
25 Am, amnion; Al, allantois; hf, headfolds; ys, yolk sac; pa i, pharyngeal arch 1; fnp, frontonasal  
26 process; lb, limb bud; is, isthmus.

27

28 **Figure S2. *Rreb1* mutant embryos exhibit defects at midgestation. A.** Quantification of the  
29 proximal to distal length of *Rreb1* wild-type (*Rreb1*<sup>+/+</sup>) and heterozygous (*Rreb1*<sup>+/-</sup>) versus  
30 mutant (*Rreb1*<sup>-/-</sup>) littermates at E6.5 (3 litters) and 7.5 (5 litters). Each point represents an  
31 individual embryo. Total number of embryos is shown on the graph. Data is shown relative to  
32 the average wild-type/heterozygote proximo-distal length of each litter. Bars represent mean  
33 and IQR. \*\*  $p = \leq 0.005$ , unpaired t-test. **B.** Brightfield images of wild-type (*Rreb1*<sup>+/+</sup>) and mutant  
34 (*Rreb1*<sup>-/-</sup>) littermates at embryonic day (E) 7.75, 8.0 and 9.0. *Rreb1*<sup>-/-</sup> embryos are smaller than

1 wild-type littermates and do not show stage-appropriate morphological landmarks. **C.**  
2 Quantification of relative somite number in E8.5-9.5 *Rreb1* wild-type (*Rreb1*<sup>+/+</sup>) and  
3 heterozygous (*Rreb1*<sup>+/-</sup>) versus mutant (*Rreb1*<sup>-/-</sup>) littermates. Each point represents an individual  
4 embryo. Data is shown relative to the average somite number of each litter. Separate litters are  
5 indicated by different colored points. Bars represent mean and IQR. **E-F.** Transverse  
6 cryosections of E9.0 *Rreb1* heterozygous and homozygous mutant, *Afp*-GFP littermates. Boxes  
7 mark the regions shown in higher magnification in H. Asterisks mark the open neural tube and  
8 gut tube in *Rreb1*<sup>-/-</sup>. Sb, 50  $\mu$ m. **G.** Confocal optical sections of transverse cryosections from  
9 E9.0 embryos in the region of the notochord. From left to right, images show sections from  
10 rostral to caudal regions of the anterior embryo. Sb, 20  $\mu$ m. Pr, proximal; Ds, distal; A, anterior;  
11 P, posterior; L, left lateral; R, right; D, dorsal; V, ventral; Am, amnion; Al, allantois; HF,  
12 headfolds; ML, midline; n, notochord; nt, neural tube; fg, foregut; ys, yolk sac; pcp, prechordal  
13 plate; hb, hindbrain; op, otic pit; ba, branchial arch; fb, forebrain; mb, midbrain.  
14  
15 **Figure S3. *Rreb1*<sup>-/-</sup> embryos exhibit cardiovascular defects. A.** Uniform manifold  
16 approximation and projection (UMAP) plot, generated using single cell sequencing data from  
17 Pijuan-Sala et al. (Pijuan-Sala et al., 2019). Left plot shows distinct clusters of cells representing  
18 different cell types within the embryo. Adjacent plots show the expression pattern of example  
19 genes that were significantly downregulated in *Rreb1*<sup>-/-</sup> embryos and whose expression is  
20 enriched within endoderm tissues. **B.** Graph showing the relative expression level of a panel of  
21 endoderm-associated genes from RNA-sequencing of individual *Rreb1*<sup>+/+</sup> and *Rreb1*<sup>-/-</sup> embryos  
22 that showed no significant difference in expression between genotypes. Each point represents a  
23 single embryo. Statistical analysis was performed using an Unpaired *t*-test. Bars represent  
24 median and IQR. Expression is shown relative to the mean expression in wild-type embryos. **C.**  
25 Diagram illustrating the breeding scheme used to generate *Afp*-GFP<sup>Tg/+</sup>; *Rreb1*<sup>+/+</sup> and *Rreb1*<sup>-/-</sup>  
26 embryos. **D.** Confocal MIPs of immunostained embryos *Afp*-GFP; *Rreb1*<sup>+/+</sup> and *Rreb1*<sup>-/-</sup>  
27 embryos. Arrowheads mark highlight the proximal ExVE that, in contrast to wild-type embryos,  
28 shows little to no *Afp*-GFP expression. Sb, 50  $\mu$ m. **E.** Wholemound images of E10.5 *Rreb1*<sup>LacZ/+</sup>  
29 (heterozygous) and *Rreb1*<sup>LacZ/LacZ</sup> (mutant) embryos within the yolk sac. Mutant embryos have  
30 reduced yolk sac vasculature and blood leaking into the extravascular space (arrowheads). **G.**  
31 Brightfield image of two distinct E10.5 *Rreb1*<sup>-/-</sup> embryos with reduced cranial vasculature (left)  
32 and little blood within the fetus (right). Boxes show regions of higher magnification in adjacent  
33 panels. **F-H.** Confocal maximum intensity projections showing the cranial and trunk vasculature  
34 of E9.5 embryos from Figure 3D. Sb, 50  $\mu$ m. PECAM-1 marks vasculature. ENDOGLIN marks

1 endothelial cells as well as hematopoietic, mesenchymal and neural stem cells. **H.** Arrowhead  
2 marks large blood vessel not observed in wild-type littermate. A, anterior; P, posterior; Pr,  
3 proximal; Ds, distal; D, dorsal; V, ventral; ExVE, extraembryonic VE; EmVE, embryonic VE; DE,  
4 definitive endoderm.

5  
6 **Figure S4. Loss of *Rreb1* alters epiblast adherens junction organization.** **A.** Diagram  
7 showing the methodology for quantification of E-CADHERIN protein levels along epiblast cell  
8 junctions. Lines were manually drawn along cell junctions and the relative profile of E-  
9 CADHERIN immunostaining fluorescence level along the junction was plotted, with the highest  
10 value representing 1. We then calculated the coefficient of variation of E-CADHERIN levels for  
11 each individual junction. **B.** Representative relative profile of E-CADHERIN levels in arbitrary  
12 units (a.u.) at a single *Rreb1*<sup>+/+</sup> and *Rreb1*<sup>-/-</sup> epiblast cell junction. **C.** Quantification of the  
13 coefficient of variation of E-CADHERIN immunostaining fluorescence levels at epiblast cell  
14 junctions. Each point represents a single cell junction. Bars represent mean and IQR. \*\*\*  $p \leq$   
15 0.0005, unpaired t-test. **D.** Confocal maximum intensity projections of transverse cryosections of  
16 a lateral region of the epiblast of immunostained *Rreb1*<sup>+/+</sup> and *Rreb1*<sup>-/-</sup> embryos. Sb, 10  $\mu$ m. **E.**  
17 Graph showing the relative expression level of a panel of adhesion-associated genes from  
18 RNA-sequencing of individual *Rreb1*<sup>+/+</sup> and *Rreb1*<sup>-/-</sup> embryos. Each point represents a single  
19 embryo. Statistical analysis was performed using an Unpaired *t*-test (\* $p < 0.05$ , \*\* $p < 0.005$ ,  
20 \*\*\* $p < 0.001$ ). Bars represent median and IQR. Expression is shown relative to the mean  
21 expression in wild-type embryos. A, anterior; P, posterior; L, left; R, right.

22  
23 **Figure S5. *Rreb1* mutant embryos have perturbed epithelial architecture.** **A.** Confocal  
24 optical sections showing transverse cryosections in the extraembryonic region of E6.5 embryos.  
25 Arrowheads highlight regions where cell layers are abnormally separated from one another. Sb,  
26 25  $\mu$ m. **B.** Brightfield images of *Rreb1*<sup>+/+</sup> and *Rreb1*<sup>-/-</sup> littermates at embryonic day 7.5.  
27 Arrowheads highlight the abnormal accumulation of cells at the anterior embryonic-  
28 extraembryonic boundary. **C.** Arrows highlight SOX17-expressing definitive endoderm cells  
29 within the wings of mesoderm. Sb, 50  $\mu$ m (A,B) and 25  $\mu$ m (C). **D.** Confocal sagittal optical  
30 sections of immunostained embryos. The *Rreb1*<sup>-/-</sup> embryo displays abnormal epithelial folding.  
31 Sb, 50  $\mu$ m. **E.** Schematic depicting methodology for angle measurements. We measured the  
32 angle of the elongated nuclear axis of epiblast cells relative to the underlying Laminin basement  
33 membrane (BM). Sb, 10  $\mu$ m. **F.** Quantification of the angle between the elongated nuclear axis  
34 and the BM of E6.5 epiblast cells. Bars represent median and IQR. Each point represents a

1 single cell. **G.** Quantification of the coefficient of variation (COV) for the nucleus-BM embryo  
2 angle in each embryo (individual points). Bars represent mean and IQR. \*\*\*  $p = \leq 0.0005$ ,  
3 unpaired t-test. **H.** Confocal optical sections of transverse cryosections in lateral (i) and anterior  
4 (ii) regions of E7.5 embryos. Arrowheads highlight regions where cell layers are abnormally  
5 separated from one another. Sb, 25  $\mu\text{m}$ . **I.** Confocal optical sections of transverse cryosection of  
6 immunostained E7.5 *Rreb1*<sup>-/-</sup> embryo. Arrowheads highlight a break in apical F-ACTIN through  
7 which epiblast cells are protruding. Box indicates region shown at higher magnification. Sb, 25  
8  $\mu\text{m}$ . **J.** Confocal optical sections of transverse cryosections of immunostained E7.5 embryos. In  
9 wild-type embryos, epiblast cells divide adjacent to the cavity (arrowheads), maintain apical F-  
10 ACTIN and remain within the epithelium. In *Rreb1*<sup>-/-</sup> embryos, we also observed dividing cells  
11 outside of the epithelium (arrowheads), within the amniotic cavity. Sb, 25  $\mu\text{m}$ . **K.** Confocal  
12 maximum intensity projections (left) and optical sections of transverse cryosections of  
13 immunostained embryos stained for phosphorylated Histone H3 (pHH3), which marks mitotic  
14 cells. Sb, 50  $\mu\text{m}$ . **L.** Quantification of proliferation in *Rreb1*<sup>+/+</sup> and *Rreb1*<sup>-/-</sup> littermates. We  
15 quantified the absolute number of pHH3-positive cells per 10  $\mu\text{m}$  cryosection (left panel) and the  
16 % of pHH3 mitotic cells in each germ layer per 10  $\mu\text{m}$  cryosection (right panel) for 3 entire  
17 embryos. There was no significant difference (unpaired *t*-test) in proliferation rate between  
18 genotypes, other than in the ExE, which is likely a reflection of the low sample number in that  
19 region. Each point represents a single dividing cell. Bars represent mean and IQR. **M.**  
20 Transverse cryosection of a lateral region of E7.5 epiblasts immunostained for the basal marker,  
21 Laminin, and apical marker, ZO-1. *Rreb1*<sup>-/-</sup> embryos maintain appropriate expression of polarity  
22 markers. To note, we observed strong anti-N-CADHERIN and ZO-1 VE fluorescence, which  
23 correlates with an apparent difference in the structure of the outer VE layer compared to wild-  
24 type embryos. This signal is also observed with other antibodies and likely represents non-  
25 specific binding. Sb, 25  $\mu\text{m}$ . **N.** Histogram showing fluorescence levels, in arbitrary units (a.u.),  
26 of Laminin and ZO-1 immunostaining measured along the apical-basal axis of a representative  
27 region of the epiblast epithelium from image in panel. Pr, proximal; Ds, distal; A, anterior; P,  
28 posterior; L, left; R, right; PS, primitive streak; Endo, endoderm; Epi, epiblast; ExVE,  
29 extraembryonic visceral endoderm; Meso, mesoderm; ExE, extraembryonic ectoderm.

30

31 **Figure S6. Loss of *Rreb1* promotes invasive cell behaviors.** **A.** Graph showing the  
32 expression level in arbitrary units (a.u.) of *Ovol1* and *Cldn7* from RNA-sequencing of individual  
33 *Rreb1*<sup>+/+</sup> and *Rreb1*<sup>-/-</sup> embryos. Each point represents a single embryo. \*\*\* $p < 0.001$ , unpaired *t*-  
34 test. Bars represent median and IQR. **B.** Confocal optical sections showing transverse

1 cryosections through immunostained embryos. Sb, 50  $\mu$ m. In the *Rreb1*<sup>-/-</sup> shown in the lower  
2 panel, SNAIL is expressed laterally on either side of the posterior epiblast rather than at the  
3 posterior pole. Thus, it is unclear whether this expression demarcates a primitive streak-like  
4 structure in this case (PS?). **G.** Arrowheads indicate ectopic SNAIL expression in epiblast cells.  
5 White lines demarcate a region containing a large cluster of epiblast cells ectopically expressing  
6 SNAIL, which exhibit more punctate  $\beta$ -CATENIN localization than in surrounding SNAIL  
7 negative epiblast cells. Pr, proximal; Ds, distal; A, anterior; P, posterior; L, left; R, right; Meso,  
8 mesoderm; Endo, endoderm; Epi, epiblast; PS, primitive streak. **C.** Confocal optical sections of  
9 transverse cryosection of immunostained E7.5 *Rreb1*<sup>-/-</sup> embryo. Arrowhead marks ectopic cells,  
10 in the upper panel, SOX2<sup>+</sup> cells leaving the epiblast and traversing the outer endoderm layer  
11 and in the lower panel, GATA6<sup>+</sup> mesoderm cells traversing the epiblast. Arrow marks SOX2<sup>+</sup>  
12 debris on the outside of the embryo which may represent dead cells. Sb, 25  $\mu$ m. **D.** Images  
13 highlighting a chain of cells apparently exiting the epiblast and traversing the outer endoderm  
14 layer. Chain of cells is artificially colored in orange in lower panel. **E.** Confocal sagittal optical  
15 section (upper panel) and maximum intensity project (MIP) (lower panel) of an immunostained  
16 E7.5 chimeric embryo containing *Rreb1*<sup>-/-</sup> ESCs. Arrowheads indicate ectopic SOX2<sup>+</sup> cells. Sb,  
17 50  $\mu$ m. **F.** Quantification of SOX2 protein levels in arbitrary units (a.u.) in normal anterior (aEpi)  
18 and posterior (pEpi) Epi cells and SOX2 high (SOX2<sup>Hl</sup>) cells in E7.5 *Rreb1*<sup>-/-</sup> chimeric embryos.  
19 Data shown relative to mean SOX2 levels within typical aEpi cells. Each point represents a  
20 measurement from an individual nucleus (n=696 cells, \*\*\*p<0.0001). **G.** Graph showing the  
21 proportion of SOX2<sup>Hl</sup> cells localized inside the Epi, at the Epi-VE interface, mesoderm or  
22 amniotic cavity in E7.5 *Rreb1*<sup>-/-</sup> chimeric embryos. Data shown as the percentage of the total  
23 SOX2<sup>Hl</sup> cells analyzed per embryo in each location. Each point represents scoring for an  
24 individual embryo. Total number of cells per location is shown above each bar. For all box plots,  
25 top and bottom edges of boxes represent third and first quartiles, respectively (interquartile  
26 range, IQR). Middle lines mark the median. Whiskers extend to 1.5 \* IQR. **H.** Confocal MIPs of  
27 immunostained E8.5 (Sb, 100  $\mu$ m) and 9.5 (Sb, 200  $\mu$ m) chimeric embryos containing *Rreb1*<sup>-/-</sup>  
28 ESCs. Arrowheads indicate ectopic SOX2<sup>+</sup> cells. **I.** Confocal sagittal optical section of a pre-  
29 gastrulation E6.0 chimeric embryo containing *Rreb1*<sup>-/-</sup> ESCs. Arrowheads mark ectopic SOX2<sup>+</sup>  
30 cells. mCherry marks ESC progeny. Sb, 25  $\mu$ m. Boxes show regions displayed at higher  
31 magnification. Brackets mark primitive streak. A, anterior; P, posterior; L, left; R, right; Pr,  
32 proximal; Ds, distal; Epi, epiblast; Endo, endoderm; Meso, mesoderm; PS, primitive streak; NE,  
33 neurectoderm; Am, amnion; Al, allantois; ExE, extraembryonic ectoderm.

34



1 **Figure S7. *Rreb1* chimeras display changes in ECM organization. A,C,D.** Confocal optical  
2 sections and maximum intensity projections (MIP) of transverse cryosections of immunostained  
3 E7.5 chimeric embryos containing *Rreb1*<sup>-/-</sup> ESCs. Sb, 10 μm. **A.** Cherry fluorescence is a  
4 constitutive lineage label marking the progeny of *Rreb1*<sup>-/-</sup> embryonic stem cells (ESCs)  
5 introduced into host embryos. Magenta arrowheads mark ectopic SOX2<sup>+</sup> cells derived from  
6 *Rreb1*<sup>-/-</sup> cells. **C.** Arrowhead marks an ectopic break in the basement membrane in a lateral  
7 region of the embryo. **D.** Dashed line traces the approximate line of measurement of the  
8 Laminin track. Boxes show regions displayed at higher magnification. A, anterior; P, posterior; L,  
9 left; R, right; Epi, epiblast; Endo, endoderm; Meso; mesoderm.

10

11 **Table S1. List of genes that are differentially expressed between wildtype and *Rreb1***  
12 **mutant embryos.** Differentially-expressed genes were defined as those meeting fold change  
13 cutoff log<sub>2</sub>(2), adjusted p-value cutoff 0.05, and mean coverage of at least 15.

14

15 **Table S2. Gene Ontology (GO) analysis of genes significantly upregulated and**  
16 **downregulated in E7.5 *Rreb1* mutant embryos.** Gene ontology analyses were performed  
17 using the Database for Annotation, Visualization, and Integrated Discovery (DAVID)  
18 Bioinformatics resource gene ontology functional annotation tool with all NCBI Mus musculus  
19 genes as a reference list.

20

21 **Table S3. KEGG pathway analysis of genes significantly upregulated and downregulated**  
22 **in E7.5 *Rreb1* mutant embryos.** KEGG pathway analysis was performed using the Database  
23 for Annotation, Visualization, and Integrated Discovery (DAVID) Bioinformatics tool.

24

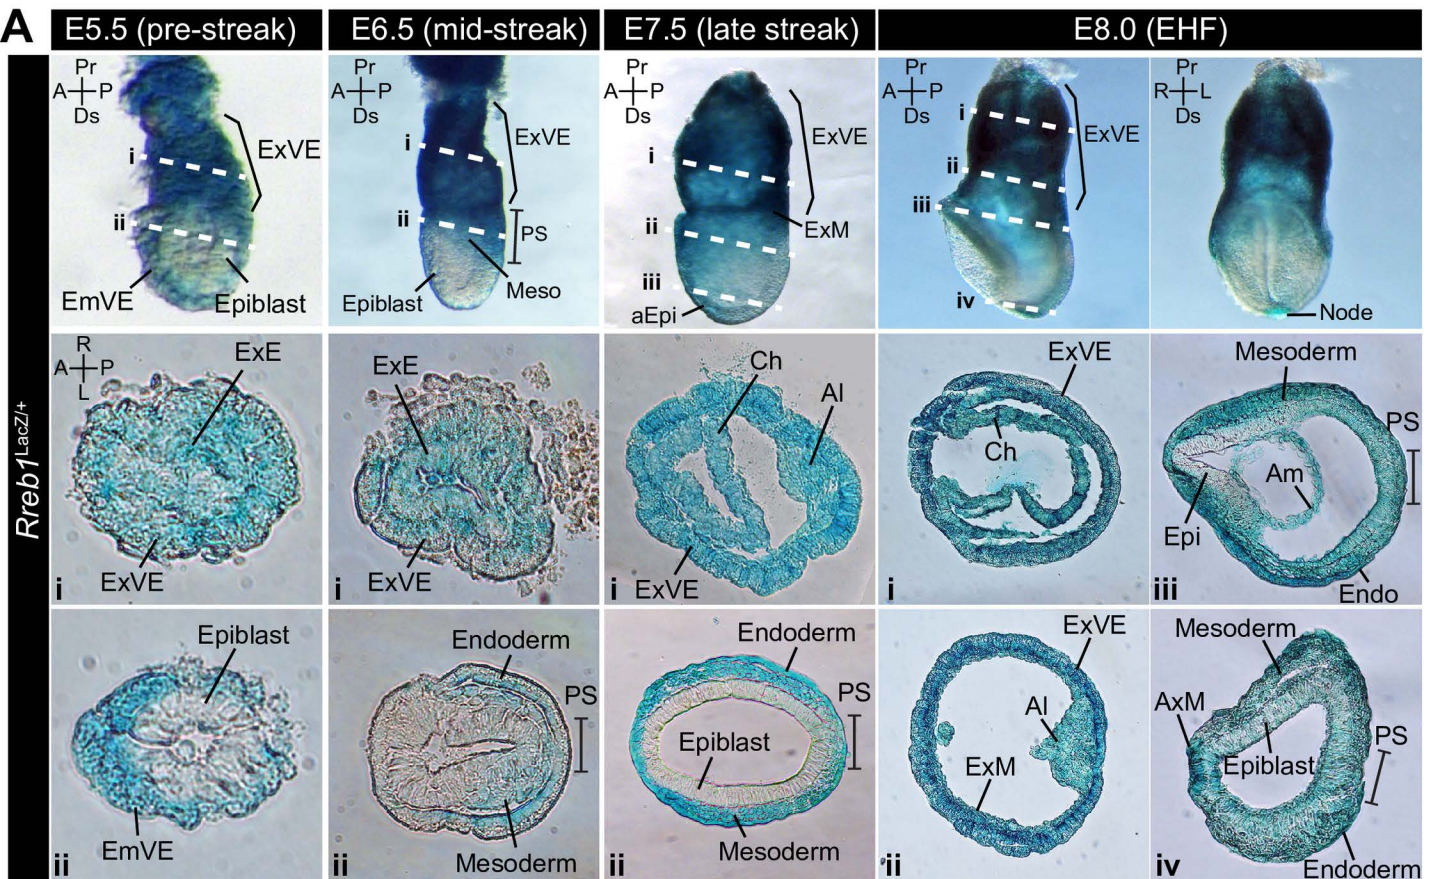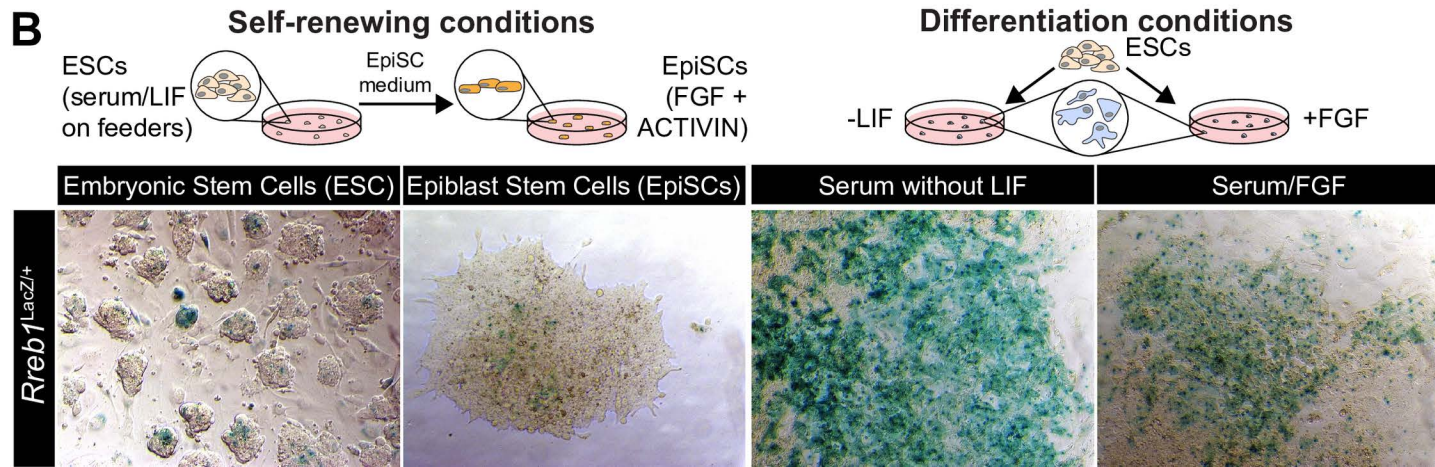

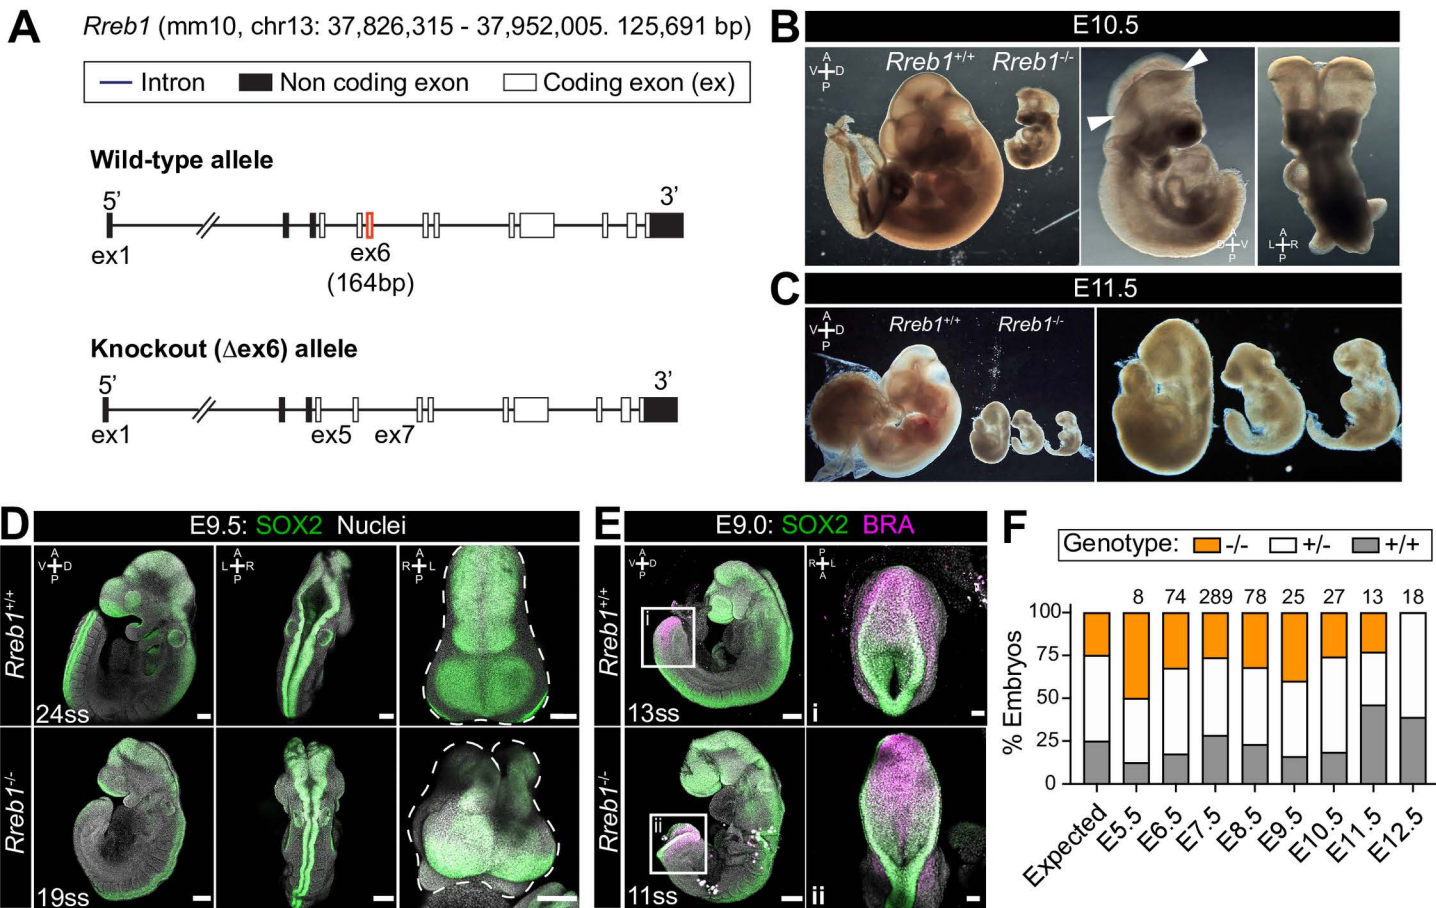

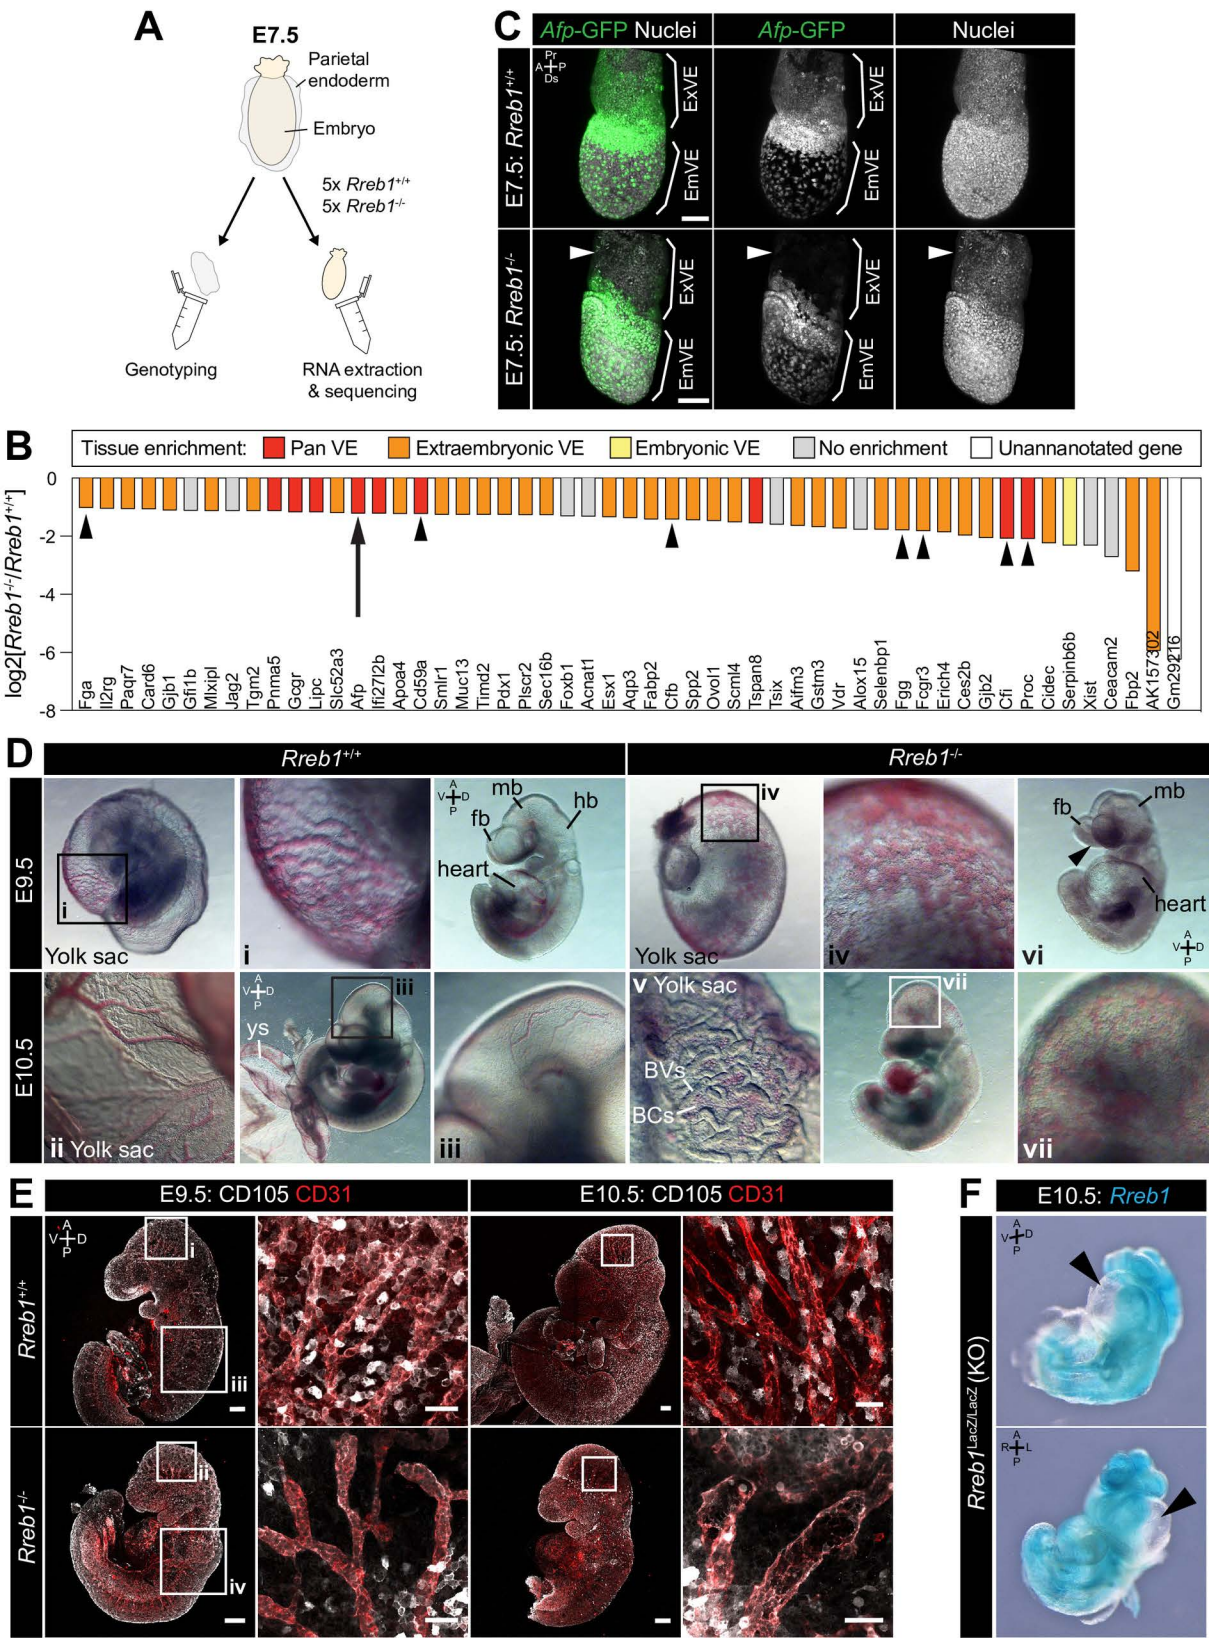

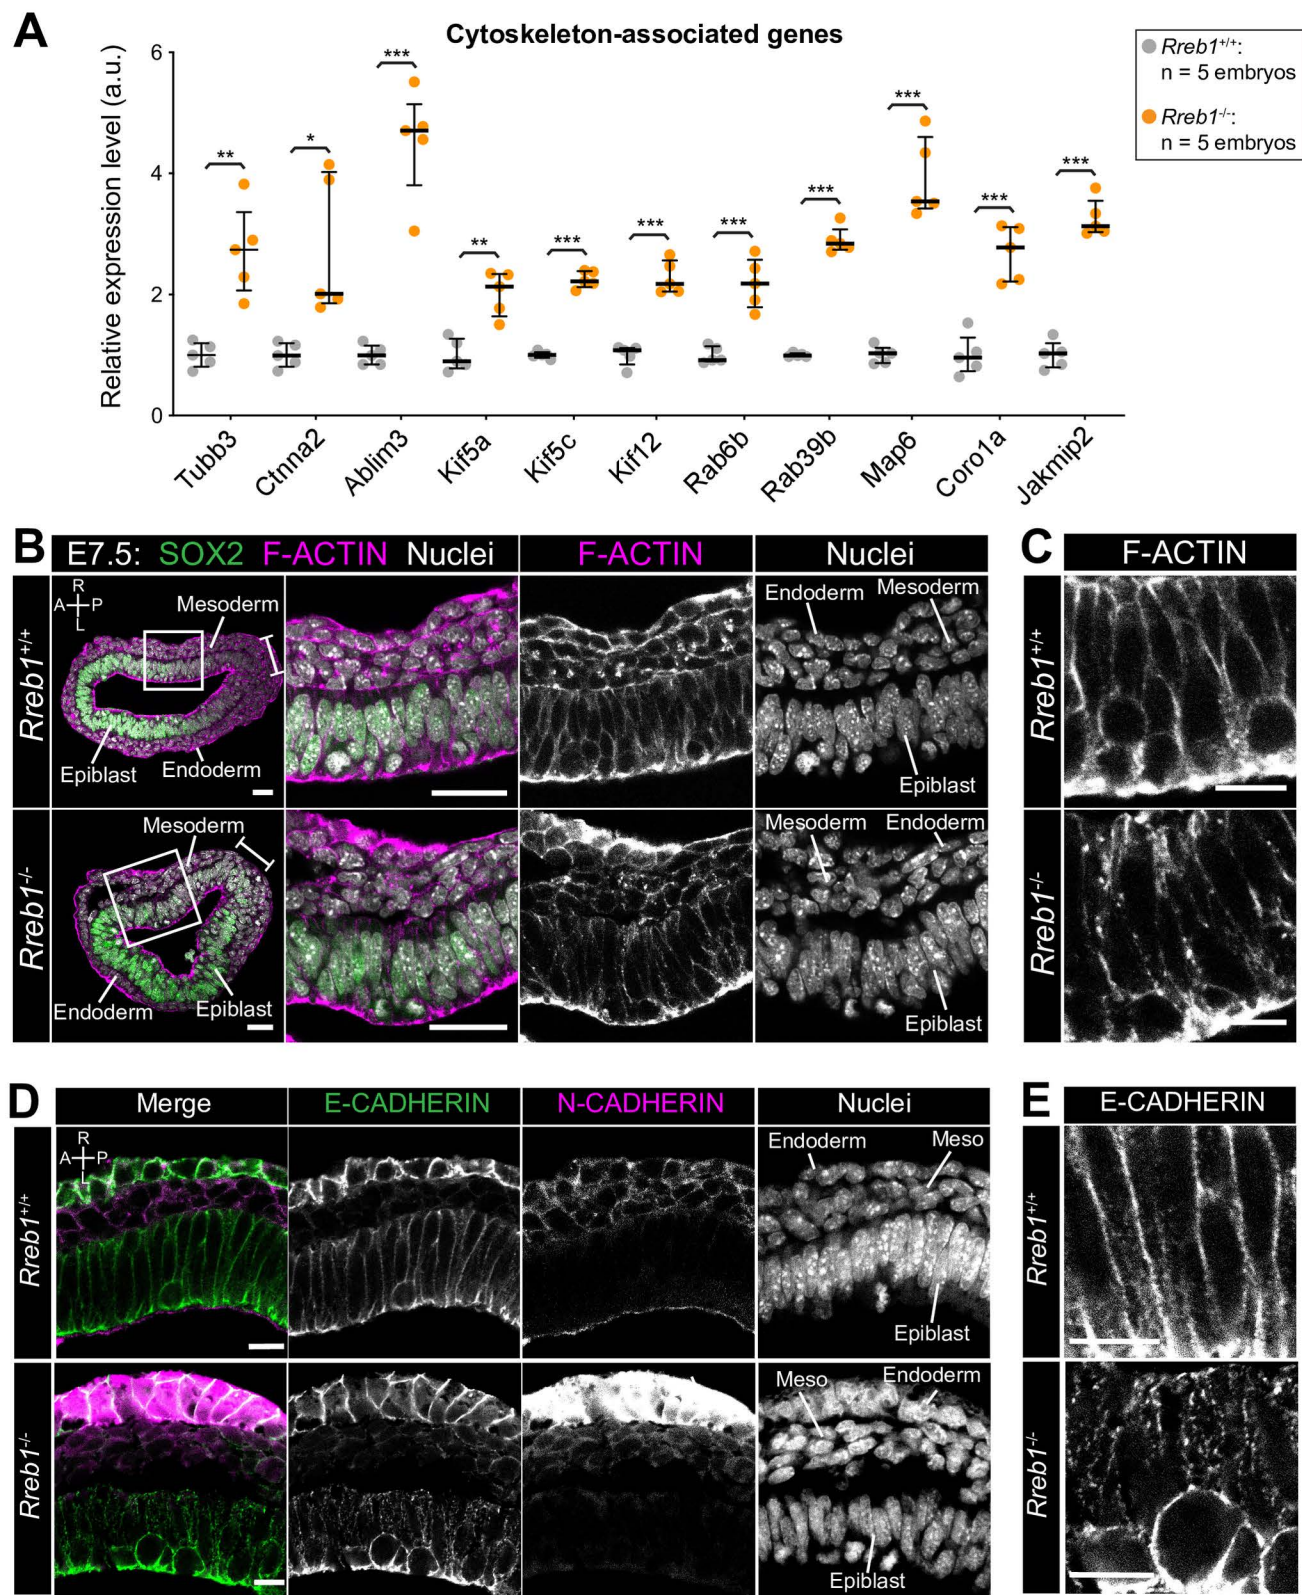

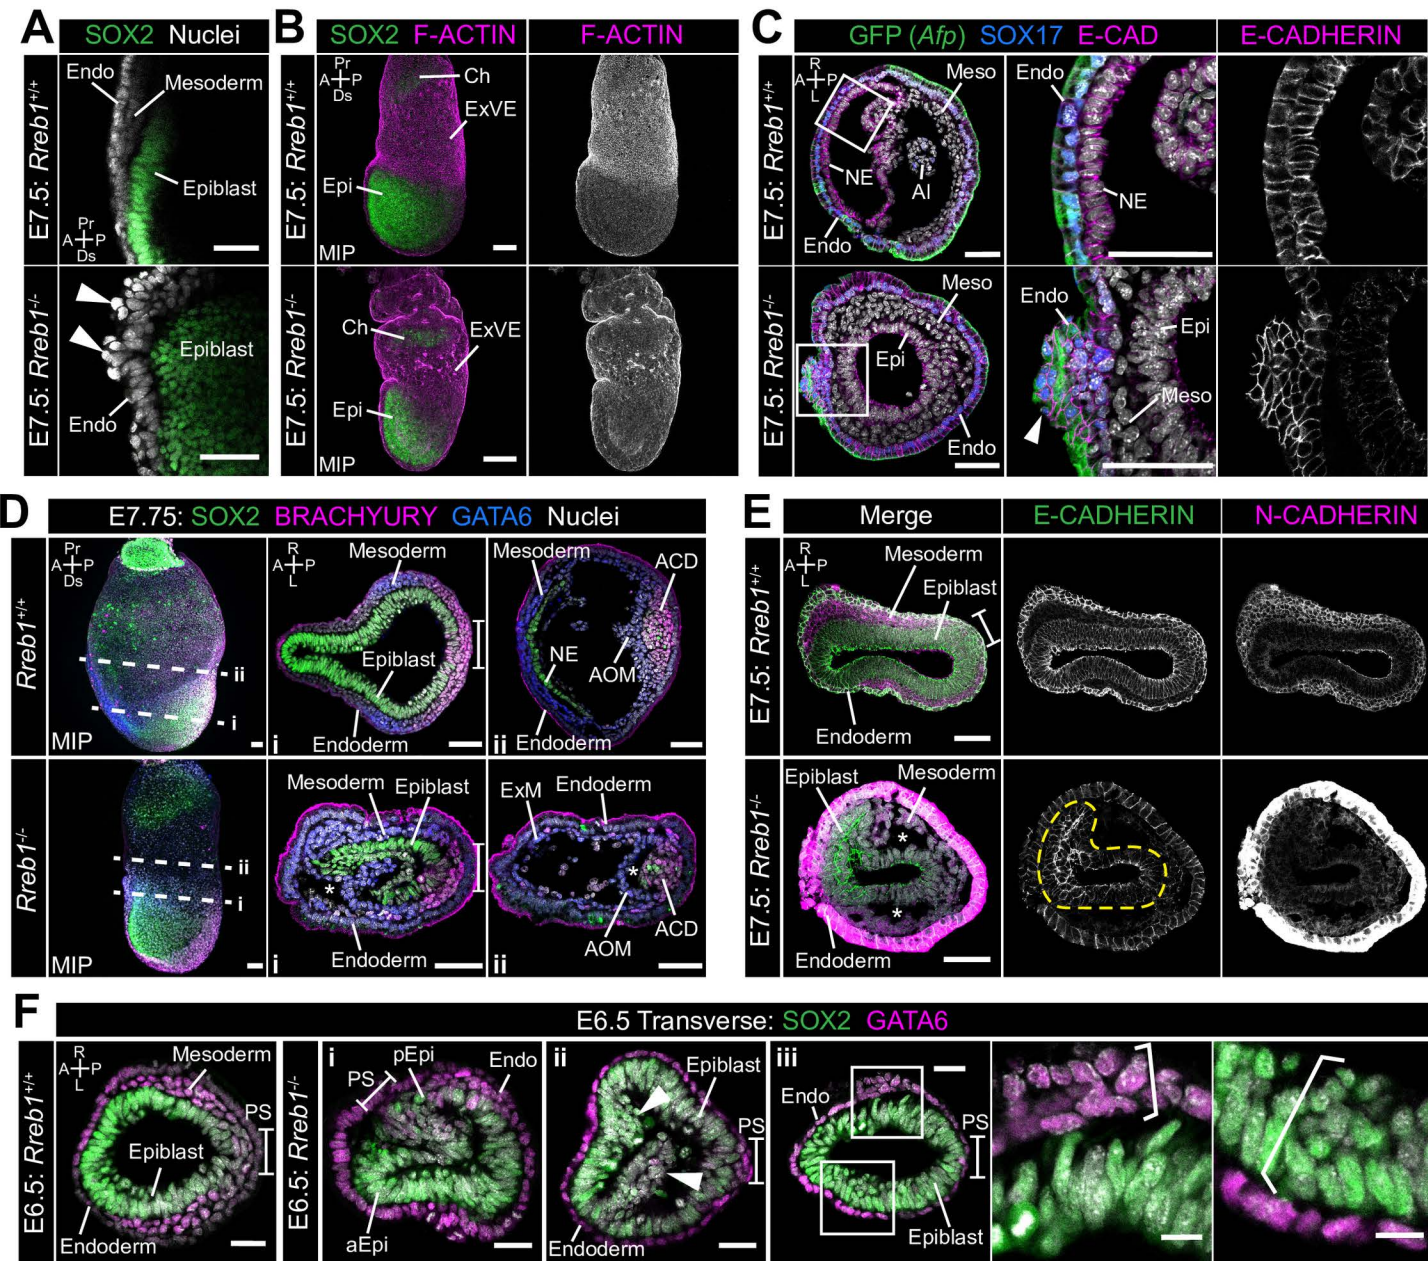

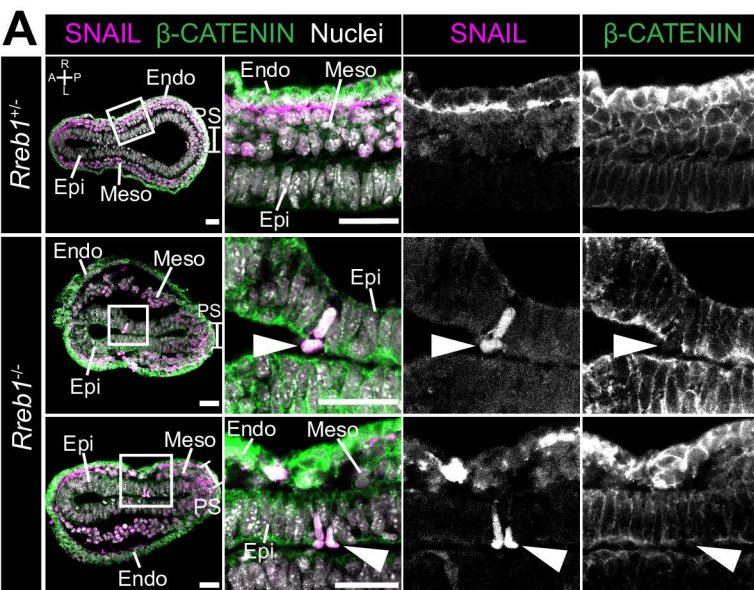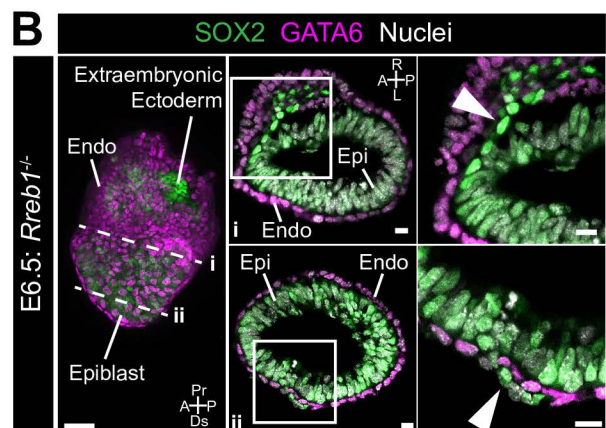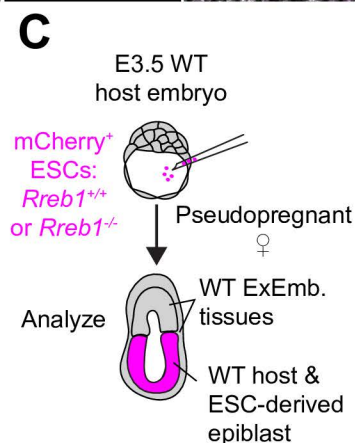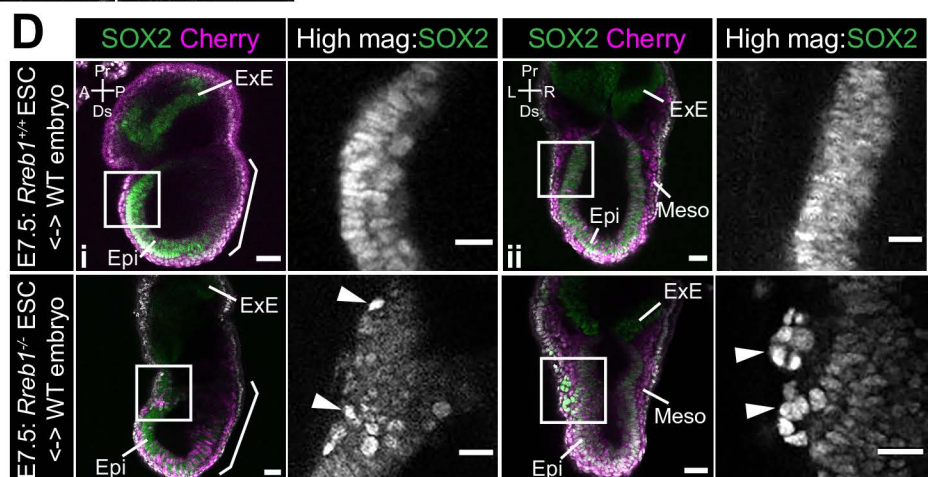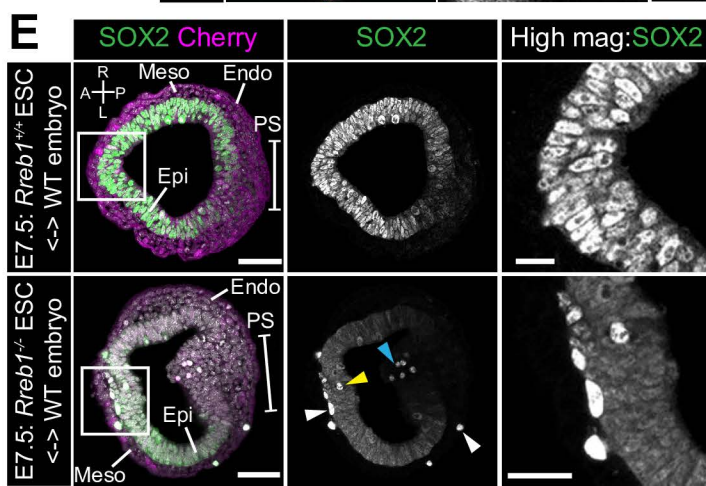

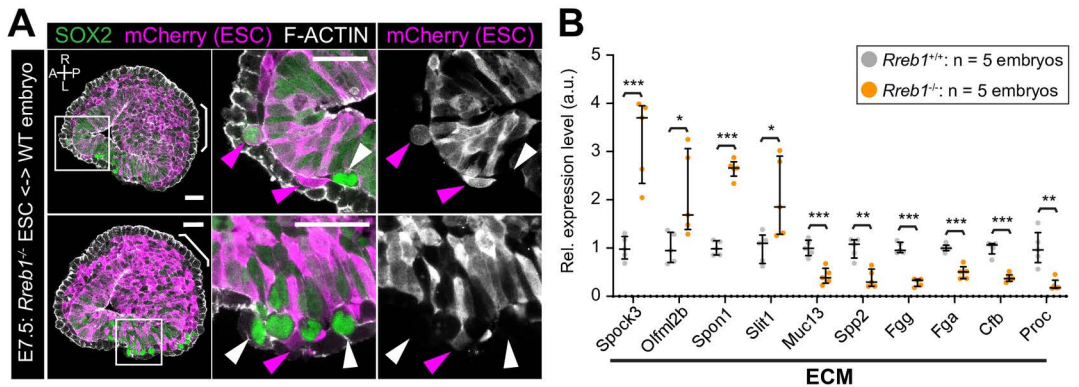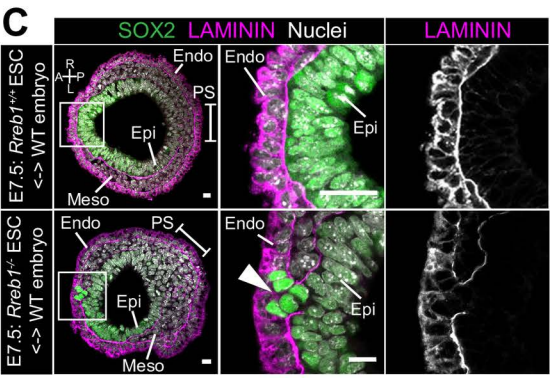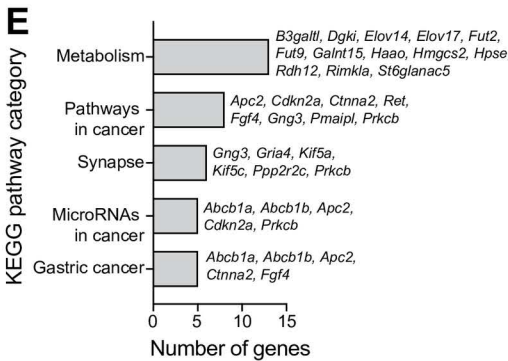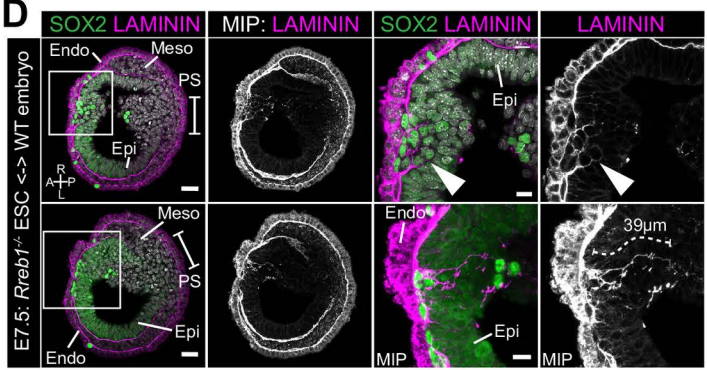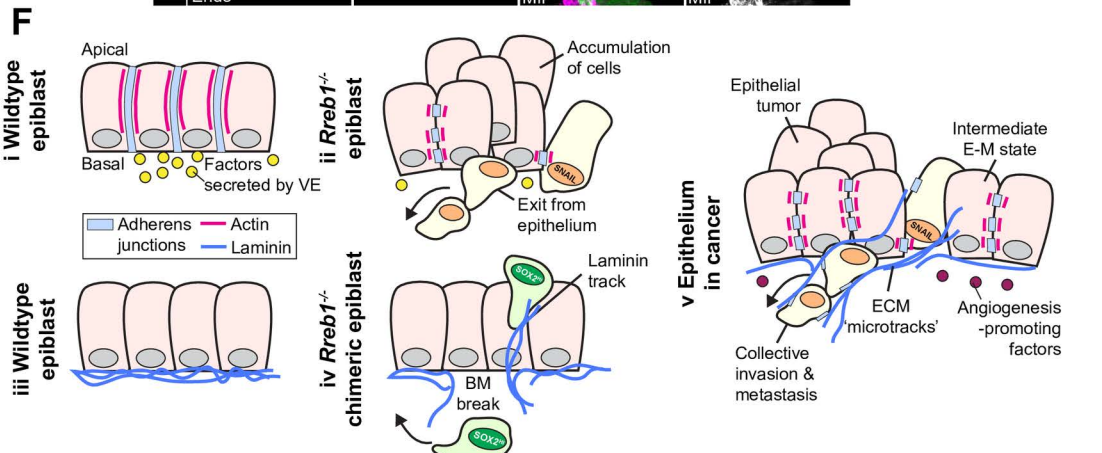

Source: https://biorxiv.org/content/10.1101/2020.11.12.379578v1.full.pdf
